# Supplementary material
Source: PubMed Central journal article supplement (PMC2216049)
Supplement: neo1001_0020SD1.pdf [file neo1001_0020SD1.pdf]

**Table W1.** Primers Used for Real-Time q-PCR.

| Name        | Sequence              | Accession No.  | $T_m$ | Product Size (bp) |
|-------------|-----------------------|----------------|-------|-------------------|
| BCAR_UP1    | CCAGGTTCCCAGGACATCTA  | NM_012931.1    | 59.92 |                   |
| BCAR_LP1    | TGCTCACAGAAGGAGGAACA  | NM_012931.1    | 59.55 | 214               |
| CEBPD_UP1   | CAGGAGATGCAGCAGAAGC   | NM_013154.1    | 59.83 |                   |
| CEBPD_LP1   | GTATCGGTTCGTTCCGAGTCT | NM_013154.1    | 59.17 | 198               |
| Gpx3_UP1    | ACCAATTTGGCAAACAGGAG  | NM_022525.2    | 59.97 |                   |
| Gpx3_LP1    | TCAAAGAGCTGAAAATTAGGC | NM_022525.2    | 59.18 | 110               |
| Hoxa1_UP2   | TTCTCCAGCGCAGACCTT    | NM_013075.1    | 59.66 |                   |
| Hoxa1_LP2   | CCCACGTAGCCATACTCTCC  | NM_013075.1    | 59.57 | 84                |
| KLRB1_UP1   | TGGATAAACCGGCTCGACTTT | NM_173292.1    | 59.71 |                   |
| KLRB1_LP1   | GCACTTTGTCTGTGAGACG   | NM_173292.1    | 59.47 | 94                |
| MAFB_UP2    | AACGGTCCAGCAGAAACAT   | NM_019316.1    | 59    |                   |
| MAFB_LP2    | CTGCTCCACCTGCTGAATGA  | NM_019316.1    | 59    | 65                |
| Nxph3_UP1   | CTGCTGCTTCGTGTTCTAGT  | NM_021679.1    | 52.38 |                   |
| Nxph3_LP1   | CATCATGCTCAGGGTCCTC   | NM_021679.1    | 57.89 | 95                |
| PLAU_UP1    | AGCTGCCAAAGAAATTCAA   | NM_013085.2    | 59.82 |                   |
| PLAU_LP1    | TGGTGTCAAGTATGGCCTTTC | NM_013085.2    | 59.99 | 106               |
| SMAD7_UP1   | AGAGGCTGTGTGTGCTGTGAA | NM_030858.1    | 59.62 |                   |
| SMAD7_LP1   | GAGGAAGGTACAGCGTCTGG  | NM_030858.1    | 59.87 | 172               |
| SRC_UP1     | TGTGGAGCGGATGAACATATG | NM_031977.1    | 59.67 |                   |
| SRC_LP1     | TGATGGTGAACCTGCCATAC  | NM_031977.1    | 59.37 | 197               |
| Thra_T1_UP1 | ACAAGGCCACCGGTTATCAC  | NM_001017960.1 | 58    |                   |
| Thra_T1_LP1 | GCGAAAGAAGCCCTTGCA    | NM_001017960.1 | 59    | 62                |
| TP53_UP1    | ACGTGCTCACACTGGCTAAA  | NM_030989.1    | 59.51 |                   |
| TP53_LP1    | GGAGCTCGATGCTCATATCC  | NM_030989.1    | 59.76 | 189               |

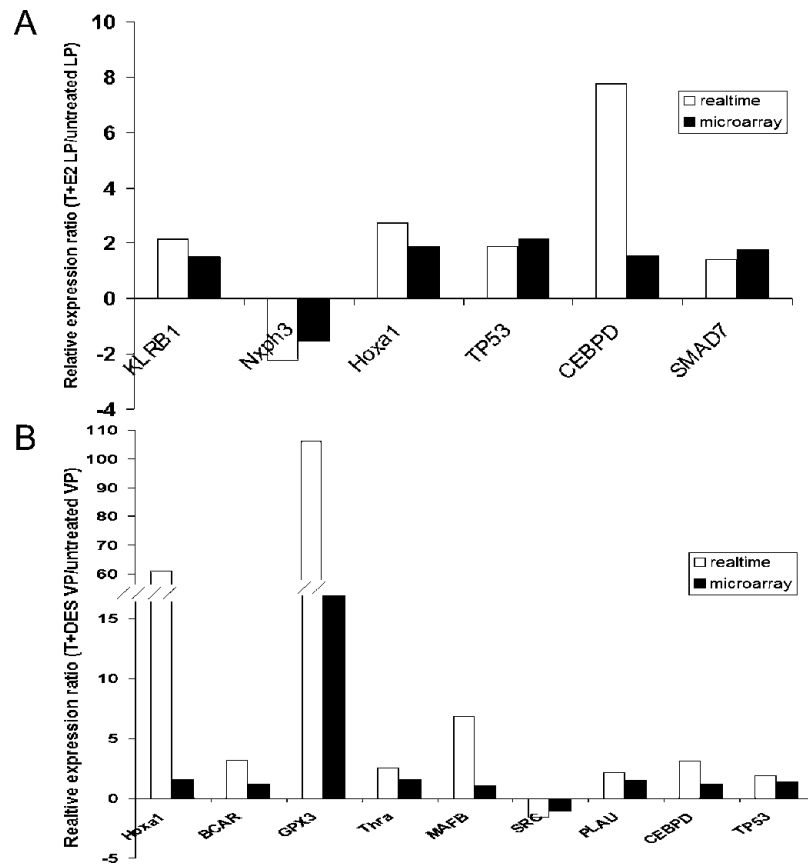

**Figure W1.** Comparison of real-time q-PCR to microarray findings. Genes selected from (A) T + E<sub>2</sub>-induced LP dysplasia and (B) T + DES-induced VP dysplasia panels.

**Table W2.** Genes Whose Expression Altered following T + E<sub>2</sub> in the VPs with No Dysplastic Changes.

| Gene Names                                                          | Locus ID | Symbol         | Fold Changes                       | P                                  | FDR                                |
|---------------------------------------------------------------------|----------|----------------|------------------------------------|------------------------------------|------------------------------------|
|                                                                     |          |                | T + E <sub>2</sub> VP <i>vs</i> VP | T + E <sub>2</sub> VP <i>vs</i> VP | T + E <sub>2</sub> VP <i>vs</i> VP |
| <b>Cell morphology</b>                                              |          |                |                                    |                                    |                                    |
| contactin-associated protein 1                                      | 84008    | <i>CNTNAP1</i> | 2.33                               | .0125                              | 0.739395415                        |
| <b>Cell to cell signaling and interaction</b>                       |          |                |                                    |                                    |                                    |
| contactin-associated protein 1                                      | 84008    | <i>CNTNAP1</i> | 2.33                               | .0125                              | 0.739395415                        |
| <b>Cellular growth and proliferation</b>                            |          |                |                                    |                                    |                                    |
| potassium voltage-gated channel, shaker-related subfamily, member 5 | 25470    | <i>KCNA5</i>   | -1.83                              | .0227                              | 0.766365976                        |
| solute carrier family 12, member 2                                  | 83629    | <i>SLC12A2</i> | 1.57                               | .0142                              | 0.739395415                        |
| <b>Molecular transport</b>                                          |          |                |                                    |                                    |                                    |
| potassium voltage-gated channel, shaker-related subfamily, member 5 | 25470    | <i>KCNA5</i>   | -1.83                              | .0227                              | 0.766365976                        |
| solute carrier family 12, member 2                                  | 83629    | <i>SLC12A2</i> | 1.57                               | .0142                              | 0.739395415                        |
| <b>Carbohydrate metabolism</b>                                      |          |                |                                    |                                    |                                    |
| lysozyme                                                            | 25211    | <i>LYZ</i>     | -1.55                              | .1027                              | 0.916873843                        |
| <b>Cellular assembly and organization</b>                           |          |                |                                    |                                    |                                    |
| potassium voltage-gated channel, shaker-related subfamily, member 5 | 25470    | <i>KCNA5</i>   | -1.83                              | .0227                              | 0.766365976                        |
| mucin 5, subtypes A and C, tracheobronchial/gastric                 | 65188    | <i>MUC5AC</i>  | 1.70                               | .0134                              | 0.739395415                        |
| <b>Small molecule biochemistry</b>                                  |          |                |                                    |                                    |                                    |
| ornithine decarboxylase antizyme inhibitor                          | 58961    | <i>AZIN1</i>   | 1.51                               | .0801                              | 0.886144389                        |
| solute carrier family 12, member 2                                  | 83629    | <i>SLC12A2</i> | 1.57                               | .0142                              | 0.739395415                        |
| lysozyme                                                            | 25211    | <i>LYZ</i>     | -1.55                              | .1027                              | 0.916873843                        |
| <b>Cell death</b>                                                   |          |                |                                    |                                    |                                    |
| solute carrier family 12, member 2                                  | 83629    | <i>SLC12A2</i> | 1.57                               | .0142                              | 0.739395415                        |
| SH3-domain kinase binding protein 1                                 | 84357    | <i>SH3KBP1</i> | -1.56                              | .0011                              | 0.443416906                        |
| <b>Cellular function and maintenance</b>                            |          |                |                                    |                                    |                                    |
| potassium voltage-gated channel, shaker-related subfamily, member 5 | 25470    | <i>KCNA5</i>   | -1.83                              | .0227                              | 0.766365976                        |
| mucin 5, subtypes A and C, tracheobronchial/gastric                 | 65188    | <i>MUC5AC</i>  | 1.70                               | .0134                              | 0.739395415                        |
| <b>Cell signaling</b>                                               |          |                |                                    |                                    |                                    |
| major histocompatibility complex, class II, DM beta                 | 294273   | <i>HLA-DMB</i> | 1.51                               | .0185                              | 0.739395415                        |
| <b>Drug metabolism</b>                                              |          |                |                                    |                                    |                                    |
| solute carrier family 12, member 2                                  | 83629    | <i>SLC12A2</i> | 1.57                               | .0142                              | 0.739395415                        |
| <b>Lipid metabolism</b>                                             |          |                |                                    |                                    |                                    |
| solute carrier family 12, member 2                                  | 83629    | <i>SLC12A2</i> | 1.57                               | .0142                              | 0.739395415                        |

We propose that these genes were not related to dysplasia development.

Genes were categorized according to their cellular functions (in bold and italics).

**Table W3.** Genes that Showed Altered Levels of Expression following T + DES in the LPs with No Dysplastic Changes.

| Gene Names                                                                                     | Locus ID | Symbol         | Fold Changes            | P                       | FDR                     |
|------------------------------------------------------------------------------------------------|----------|----------------|-------------------------|-------------------------|-------------------------|
|                                                                                                |          |                | T + DES LP <i>vs</i> LP | T + DES LP <i>vs</i> LP | T + DES LP <i>vs</i> LP |
| <b>Cell morphology</b>                                                                         |          |                |                         |                         |                         |
| actin alpha cardiac 1                                                                          | 29275    | <i>ACTC1</i>   | 2.30                    | .0000                   | 0.000248913             |
| actinin alpha 4                                                                                | 63836    | <i>ACTN4</i>   | -1.62                   | .0004                   | 0.015327409             |
| adducin 2 (beta)                                                                               | 24171    | <i>ADD2</i>    | -1.50                   | .0023                   | 0.046831092             |
| adrenergic receptor kinase, beta 1                                                             | 25238    | <i>ADRBK1</i>  | -1.33                   | .0048                   | 0.067126523             |
| allograft inflammatory factor 1                                                                | 29427    | <i>AIF1</i>    | -1.58                   | .0001                   | 0.007642386             |
| alanyl (membrane) aminopeptidase                                                               | 81641    | <i>ANPEP</i>   | 1.23                    | .0662                   | 0.309192141             |
| small inducible cytokine A4                                                                    | 116637   | <i>CCL4</i>    | 1.50                    | .0017                   | 0.038035447             |
| cofilin 1                                                                                      | 29271    | <i>CFL1</i>    | -1.39                   | .0163                   | 0.137582819             |
| discs, large homolog 4 ( <i>Drosophila</i> )                                                   | 29495    | <i>DLG4</i>    | 1.28                    | .0138                   | 0.12501336              |
| endothelial differentiation, lysophosphatidic acid<br>G-protein-coupled receptor, 2            | 116744   | <i>EDG2</i>    | 1.50                    | .0006                   | 0.020782669             |
| ephrin A1                                                                                      | 94268    | <i>EFNA1</i>   | -1.33                   | .0595                   | 0.29465518              |
| espin                                                                                          | 56227    | <i>ESPN</i>    | -1.65                   | .0004                   | 0.015327409             |
| growth hormone-releasing hormone                                                               | 29446    | <i>GHRH</i>    | 1.87                    | .0000                   | 0.000562125             |
| gap junction membrane channel protein alpha 3                                                  | 79217    | <i>GJA3</i>    | -1.67                   | .0003                   | 0.013918065             |
| interleukin 5                                                                                  | 24497    | <i>IL5</i>     | -1.52                   | .0526                   | 0.275768333             |
| potassium inwardly rectifying channel, subfamily J,<br>member 10                               | 29718    | <i>KCNJ10</i>  | 1.57                    | .0002                   | 0.011445829             |
| NK6 transcription factor-related, locus 1 ( <i>Drosophila</i> )                                | 65193    | <i>NKX6-1</i>  | -1.31                   | .0144                   | 0.128278942             |
| protein kinase C and casein kinase substrate in<br>neurons 2                                   | 124461   | <i>PACSIN2</i> | 1.27                    | .0261                   | 0.187905149             |
| p21 (CDKN1A)-activated kinase1                                                                 | 29431    | <i>PAK1</i>    | 1.99                    | .0000                   | 0.001151782             |
| paired box gene 6                                                                              | 25509    | <i>PAX6</i>    | -1.72                   | .0000                   | 0.001014633             |
| synuclein, gamma                                                                               | 64347    | <i>SNCG</i>    | -1.83                   | .0014                   | 0.034901656             |
| Arg/Abl-interacting protein Arg BP2                                                            | 114901   | <i>SORBS2</i>  | 1.20                    | .0883                   | 0.361834544             |
| transition protein 2                                                                           | 24840    | <i>TNP2</i>    | -1.46                   | .0025                   | 0.048139684             |
| ubiquitin A-52 residue ribosomal protein fusion<br>product 1                                   | 64156    | <i>UBA52</i>   | -1.94                   | .0001                   | 0.004893344             |
| ubiquitin-conjugating enzyme E2I                                                               | 25573    | <i>UBE2I</i>   | 1.53                    | .0001                   | 0.008104491             |
| vesicle docking protein                                                                        | 56042    | <i>VDP</i>     | -1.33                   | .0114                   | 0.114843401             |
| <b>Cellular movement</b>                                                                       |          |                |                         |                         |                         |
| actin, beta                                                                                    | 81822    | <i>ACTB</i>    | -1.34                   | .0132                   | 0.121186877             |
| actinin alpha 4                                                                                | 63836    | <i>ACTN4</i>   | -1.62                   | .0004                   | 0.015327409             |
| a disintegrin and metallopeptidase domain 1a                                                   | 56777    | <i>ADAM1A</i>  | -1.69                   | .0007                   | 0.023296301             |
| adrenergic receptor kinase, beta 1                                                             | 25238    | <i>ADRBK1</i>  | -1.33                   | .0048                   | 0.067126523             |
| alanyl (membrane) aminopeptidase                                                               | 81641    | <i>ANPEP</i>   | 1.23                    | .0662                   | 0.309192141             |
| small inducible cytokine A4                                                                    | 116637   | <i>CCL4</i>    | 1.50                    | .0017                   | 0.038035447             |
| cofilin 1                                                                                      | 29271    | <i>CFL1</i>    | -1.39                   | .0163                   | 0.137582819             |
| calponin 1                                                                                     | 65204    | <i>CNN1</i>    | -1.04                   | .7878                   | 0.930382649             |
| cytotoxic T-lymphocyte-associated protein 4                                                    | 63835    | <i>CTLA4</i>   | 1.25                    | .0618                   | 0.301897804             |
| chemokine orphan receptor 1                                                                    | 84348    | <i>CXCR7</i>   | -1.57                   | .0008                   | 0.025012801             |
| discoidin domain receptor family, member 1                                                     | 25678    | <i>DDR1</i>    | -1.75                   | .0000                   | 0.002145778             |
| defensin beta 1                                                                                | 83687    | <i>DEFB1</i>   | -1.15                   | .1095                   | 0.409029443             |
| endothelial differentiation, lysophosphatidic acid<br>G-protein-coupled receptor, 2            | 116744   | <i>EDG2</i>    | 1.50                    | .0006                   | 0.020782669             |
| ephrin A1                                                                                      | 94268    | <i>EFNA1</i>   | -1.33                   | .0595                   | 0.29465518              |
| coagulation factor X                                                                           | 29243    | <i>F10</i>     | -1.80                   | .0004                   | 0.016178933             |
| proprotein convertase subtilisin/kexin type 3                                                  | 54281    | <i>FURIN</i>   | -1.46                   | .0026                   | 0.048296067             |
| guanine nucleotide binding protein, alpha z subunit                                            | 25740    | <i>GNAZ</i>    | 1.46                    | .0041                   | 0.060465974             |
| glycogen synthase kinase 3 alpha                                                               | 50686    | <i>GSK3A</i>   | -1.27                   | .0048                   | 0.066546045             |
| guanylate cyclase 1, soluble, alpha 3                                                          | 25201    | <i>GUCY1A3</i> | 2.07                    | .0000                   | 0.000248913             |
| interleukin 5                                                                                  | 24497    | <i>IL5</i>     | -1.52                   | .0526                   | 0.275768333             |
| mucosal vascular addressin cell adhesion molecule 1                                            | 54266    | <i>MADCAM1</i> | -1.53                   | .0051                   | 0.068231134             |
| metastasis-associated 1                                                                        | 64520    | <i>MTA1</i>    | -1.40                   | .0225                   | 0.172625732             |
| NK6 transcription factor-related, locus 1 ( <i>Drosophila</i> )                                | 65193    | <i>NKX6-1</i>  | -1.31                   | .0144                   | 0.128278942             |
| nuclear receptor subfamily 4, group A, member 3                                                | 58853    | <i>NR4A3</i>   | -1.51                   | .0383                   | 0.23317558              |
| p21 (CDKN1A)-activated kinase 1                                                                | 29431    | <i>PAK1</i>    | 1.99                    | .0000                   | 0.001151782             |
| paired box gene 6                                                                              | 25509    | <i>PAX6</i>    | -1.72                   | .0000                   | 0.001014633             |
| polymeric immunoglobulin receptor                                                              | 25046    | <i>PIGR</i>    | -1.35                   | .0066                   | 0.080018243             |
| protein kinase N1                                                                              | 29355    | <i>PKN1</i>    | 1.51                    | .0001                   | 0.005817694             |
| phospholipase C, beta 3                                                                        | 29322    | <i>PLCB3</i>   | -1.54                   | .0020                   | 0.043467607             |
| prion protein                                                                                  | 24686    | <i>PRNP</i>    | -1.33                   | .1183                   | 0.42614185              |
| protein tyrosine phosphatase, receptor type, F                                                 | 360406   | <i>PTPRF</i>   | -1.44                   | .0029                   | 0.050810807             |
| retinoic acid receptor, alpha                                                                  | 24705    | <i>RARA</i>    | -1.45                   | .0003                   | 0.0125346               |
| slit homolog 3 ( <i>Drosophila</i> )                                                           | 83467    | <i>SLIT3</i>   | 1.51                    | .0005                   | 0.017227903             |
| synuclein, gamma                                                                               | 64347    | <i>SNCG</i>    | -1.83                   | .0014                   | 0.034901656             |
| ventral anterior homeobox 1                                                                    | 64571    | <i>VAX1</i>    | -1.52                   | .0001                   | 0.007642386             |
| tyrosine 3-monooxygenase/tryptophan 5-monooxygenase<br>activation protein, epsilon polypeptide | 29753    | <i>YWHAE</i>   | -1.54                   | .0014                   | 0.034901656             |

Table W3. (continued)

| Gene Names                                                                                     | Locus ID | Symbol         | Fold Changes            |                         |                         |
|------------------------------------------------------------------------------------------------|----------|----------------|-------------------------|-------------------------|-------------------------|
|                                                                                                |          |                | T + DES LP <i>vs</i> LP | T + DES LP <i>vs</i> LP | T + DES LP <i>vs</i> LP |
| <b>Cell signaling</b>                                                                          |          |                |                         |                         |                         |
| adrenergic receptor, alpha 2c                                                                  | 24175    | <i>ADRA2C</i>  | -1.35                   | .0729                   | 0.3262758               |
| adrenergic receptor kinase, beta 1                                                             | 25238    | <i>ADRBK1</i>  | -1.33                   | .0048                   | 0.067126523             |
| calcineurin binding protein 1                                                                  | 94165    | <i>CABIN1</i>  | 1.47                    | .0000                   | 0.004028913             |
| calcium channel, voltage-dependent, T type, alpha 1<br>G subunit                               | 29717    | <i>CACNA1G</i> | -1.50                   | .0002                   | 0.011161422             |
| small inducible cytokine A4                                                                    | 116637   | <i>CCLA</i>    | 1.50                    | .0017                   | 0.038035447             |
| endothelial differentiation, lysophosphatidic acid<br>G-protein-coupled receptor, 2            | 116744   | <i>EDG2</i>    | 1.50                    | .0006                   | 0.020782669             |
| ephrin A1                                                                                      | 94268    | <i>EFNA1</i>   | -1.33                   | .0595                   | 0.29465518              |
| gamma-aminobutyric acid A receptor, rho 1                                                      | 29694    | <i>GABRR1</i>  | 1.87                    | .0000                   | 0.000345513             |
| growth hormone-releasing hormone                                                               | 29446    | <i>GHRH</i>    | 1.87                    | .0000                   | 0.000562125             |
| guanine nucleotide binding protein, beta 3                                                     | 60449    | <i>GNB3</i>    | 1.68                    | .0000                   | 0.002364708             |
| glutamate receptor, ionotropic, kainate 3                                                      | 298521   | <i>GRIK3</i>   | 2.06                    | .0000                   | 2.51e-06                |
| G protein-coupled receptor 24                                                                  | 83567    | <i>MCHR1</i>   | -1.52                   | .0002                   | 0.00962618              |
| protein kinase C and casein kinase substrate in<br>neurons 2                                   | 124461   | <i>PACSIN2</i> | 1.27                    | .0261                   | 0.187905149             |
| p21 (CDKN1A)-activated kinase 1                                                                | 29431    | <i>PAK1</i>    | 1.99                    | .0000                   | 0.001151782             |
| fertility protein SP22                                                                         | 117287   | <i>PARK7</i>   | -1.22                   | .2198                   | 0.566510451             |
| phosphodiesterase 4A                                                                           | 25638    | <i>PDE4A</i>   | -1.55                   | .0011                   | 0.030023803             |
| protein kinase N1                                                                              | 29355    | <i>PKN1</i>    | 1.51                    | .0001                   | 0.005817694             |
| Arg/Abl-interacting protein Arg BP2                                                            | 114901   | <i>SORBS2</i>  | 1.20                    | .0883                   | 0.361834544             |
| tyrosine 3-monooxygenase/tryptophan 5-monooxygenase<br>activation protein, epsilon polypeptide | 29753    | <i>YWHAE</i>   | -1.54                   | .0014                   | 0.034901656             |
| <b>Cellular growth and proliferation</b>                                                       |          |                |                         |                         |                         |
| allograft inflammatory factor 1                                                                | 29427    | <i>AIF1</i>    | -1.58                   | .0001                   | 0.007642386             |
| calcium channel, voltage-dependent, T type, alpha 1<br>G subunit                               | 29717    | <i>CACNA1G</i> | -1.50                   | .0002                   | 0.011161422             |
| small inducible cytokine A4                                                                    | 116637   | <i>CCLA</i>    | 1.50                    | .0017                   | 0.038035447             |
| CD63 antigen                                                                                   | 29186    | <i>CD63</i>    | -1.10                   | .4195                   | 0.737185743             |
| CCAAT/enhancer binding protein (C/EBP), alpha                                                  | 24252    | <i>CEBPA</i>   | -1.53                   | .0095                   | 0.101978652             |
| Cbp/p300-interacting transactivator with Glu/Asp-rich<br>carboxy-terminal domain 1             | 64466    | <i>CITED1</i>  | -1.53                   | .0019                   | 0.042644963             |
| calponin 1                                                                                     | 65204    | <i>CNN1</i>    | -1.04                   | .7878                   | 0.930382649             |
| cytotoxic T-lymphocyte-associated protein 4                                                    | 63835    | <i>CTLA4</i>   | 1.25                    | .0618                   | 0.301897804             |
| chemokine orphan receptor 1                                                                    | 84348    | <i>CXCR7</i>   | -1.57                   | .0008                   | 0.025012801             |
| discoidin domain receptor family, member 1                                                     | 25678    | <i>DDR1</i>    | -1.75                   | .0000                   | 0.002145778             |
| ddx5 gene                                                                                      | 287765   | <i>DDX5</i>    | -1.27                   | .1781                   | 0.520336467             |
| endothelial differentiation, lysophosphatidic acid<br>G-protein-coupled receptor, 2            | 116744   | <i>EDG2</i>    | 1.50                    | .0006                   | 0.020782669             |
| ephrin A1                                                                                      | 94268    | <i>EFNA1</i>   | -1.33                   | .0595                   | 0.29465518              |
| F-box only protein 2                                                                           | 85273    | <i>FBXO2</i>   | -1.42                   | .0115                   | 0.114843401             |
| growth hormone-releasing hormone receptor                                                      | 25321    | <i>GHRHR</i>   | -1.59                   | .0255                   | 0.186284598             |
| interleukin 5                                                                                  | 24497    | <i>IL5</i>     | -1.52                   | .0526                   | 0.275768333             |
| metastasis-associated 1                                                                        | 64520    | <i>MTA1</i>    | -1.40                   | .0225                   | 0.172625732             |
| nuclear receptor subfamily 4, group A, member 3                                                | 58853    | <i>NR4A3</i>   | -1.51                   | .0383                   | 0.23317558              |
| paired box gene 6                                                                              | 25509    | <i>PAX6</i>    | -1.72                   | .0000                   | 0.001014633             |
| polymeric immunoglobulin receptor                                                              | 25046    | <i>PIGR</i>    | -1.35                   | .0066                   | 0.080018243             |
| protein tyrosine phosphatase, receptor type, F                                                 | 360406   | <i>PTPRF</i>   | -1.44                   | .0029                   | 0.050810807             |
| retinoic acid receptor, alpha                                                                  | 24705    | <i>RARA</i>    | -1.45                   | .0003                   | 0.0125346               |
| synuclein, gamma                                                                               | 64347    | <i>SNCG</i>    | -1.83                   | .0014                   | 0.034901656             |
| ventral anterior homeobox 1                                                                    | 64571    | <i>VAX1</i>    | -1.52                   | .0001                   | 0.007642386             |
| zinc finger protein of the cerebellum 1                                                        | 64618    | <i>ZIC1</i>    | -1.54                   | .0002                   | 0.00960067              |
| <b>Cell to cell signaling and interaction</b>                                                  |          |                |                         |                         |                         |
| a disintegrin and metallopeptidase domain 1a                                                   | 56777    | <i>ADAM1A</i>  | -1.69                   | .0007                   | 0.023296301             |
| adrenergic receptor, alpha 2c                                                                  | 24175    | <i>ADRA2C</i>  | -1.35                   | .0729                   | 0.3262758               |
| amelogenin X chromosome                                                                        | 29160    | <i>AMELX</i>   | -1.71                   | .0000                   | 0.000345513             |
| small inducible cytokine A4                                                                    | 116637   | <i>CCLA</i>    | 1.50                    | .0017                   | 0.038035447             |
| cofilin 1                                                                                      | 29271    | <i>CFL1</i>    | -1.39                   | .0163                   | 0.137582819             |
| cytotoxic T-lymphocyte-associated protein 4                                                    | 63835    | <i>CTLA4</i>   | 1.25                    | .0618                   | 0.301897804             |
| discoidin domain receptor family, member 1                                                     | 25678    | <i>DDR1</i>    | -1.75                   | .0000                   | 0.002145778             |
| discs, large homolog 4 ( <i>Drosophila</i> )                                                   | 29495    | <i>DLG4</i>    | 1.28                    | .0138                   | 0.12501336              |
| ephrin A1                                                                                      | 94268    | <i>EFNA1</i>   | -1.33                   | .0595                   | 0.29465518              |
| coagulation factor X                                                                           | 29243    | <i>F10</i>     | -1.80                   | .0004                   | 0.016178933             |
| fibrinogen, gamma polypeptide                                                                  | 24367    | <i>FGG</i>     | -1.79                   | .0067                   | 0.080887122             |
| proprotein convertase subtilisin/kexin type 3                                                  | 54281    | <i>FURIN</i>   | -1.46                   | .0026                   | 0.048296067             |
| gap junction membrane channel protein alpha 3                                                  | 79217    | <i>GJA3</i>    | -1.67                   | .0003                   | 0.013918065             |
| interleukin 5                                                                                  | 24497    | <i>IL5</i>     | -1.52                   | .0526                   | 0.275768333             |
| mucosal vascular addressin cell adhesion molecule 1                                            | 54266    | <i>MADCAM1</i> | -1.53                   | .0051                   | 0.068231134             |
| p21 (CDKN1A)-activated kinase 1                                                                | 29431    | <i>PAK1</i>    | 1.99                    | .0000                   | 0.001151782             |
| polymeric immunoglobulin receptor                                                              | 25046    | <i>PIGR</i>    | -1.35                   | .0066                   | 0.080018243             |

Table W3. (continued)

| Gene Names                                                                       | Locus ID | Symbol        | Fold Changes     |       |             |
|----------------------------------------------------------------------------------|----------|---------------|------------------|-------|-------------|
|                                                                                  |          |               | T + DES LP vs LP | P     | FDR         |
| proteasome (prosome, macropain) 28 subunit, beta                                 | 29614    | <i>PSME2</i>  | 1.40             | .0008 | 0.025480573 |
| retinoic acid receptor, alpha                                                    | 24705    | <i>RARA</i>   | -1.45            | .0003 | 0.0125346   |
| Rhesus blood group CE and D                                                      | 60414    | <i>RHD</i>    | -1.45            | .0030 | 0.050810807 |
| ubiquitin A-52 residue ribosomal protein fusion product 1                        | 64156    | <i>UBA52</i>  | -1.94            | .0001 | 0.004893344 |
| ubiquitin-conjugating enzyme E2I                                                 | 25573    | <i>UBE2I</i>  | 1.53             | .0001 | 0.008104491 |
| ventral anterior homeobox 1                                                      | 64571    | <i>VAX1</i>   | -1.52            | .0001 | 0.007642386 |
| <b>Cellular function and maintenance</b>                                         |          |               |                  |       |             |
| blocked early in transport 1 homolog ( <i>S. cerevisiae</i> ) like               | 54400    | <i>BET1L</i>  | -1.31            | .0707 | 0.321228605 |
| calcineurin binding protein 1                                                    | 94165    | <i>CABIN1</i> | 1.47             | .0000 | 0.004028913 |
| small inducible cytokine A4                                                      | 116637   | <i>CCL4</i>   | 1.50             | .0017 | 0.038035447 |
| cofilin 1                                                                        | 29271    | <i>CFL1</i>   | -1.39            | .0163 | 0.137582819 |
| cytotoxic T-lymphocyte-associated protein 4                                      | 63835    | <i>CTLA4</i>  | 1.25             | .0618 | 0.301897804 |
| ephrin A1                                                                        | 94268    | <i>EFNA1</i>  | -1.33            | .0595 | 0.29465518  |
| fibrinogen, gamma polypeptide                                                    | 24367    | <i>FGG</i>    | -1.79            | .0067 | 0.080887122 |
| interleukin 5                                                                    | 24497    | <i>IL5</i>    | -1.52            | .0526 | 0.275768333 |
| protein kinase C and casein kinase substrate in neurons 2                        | 124461   | <i>PACSN2</i> | 1.27             | .0261 | 0.187905149 |
| p21 (CDKN1A)-activated kinase 1                                                  | 29431    | <i>PAK1</i>   | 1.99             | .0000 | 0.001151782 |
| protein tyrosine phosphatase, receptor type, F                                   | 360406   | <i>PTPRF</i>  | -1.44            | .0029 | 0.050810807 |
| retinoic acid receptor, alpha                                                    | 24705    | <i>RARA</i>   | -1.45            | .0003 | 0.0125346   |
| ubiquitin-conjugating enzyme E2I                                                 | 25573    | <i>UBE2I</i>  | 1.53             | .0001 | 0.008104491 |
| vesicle docking protein                                                          | 56042    | <i>VDP</i>    | -1.33            | .0114 | 0.114843401 |
| <b>Cellular assembly and organization</b>                                        |          |               |                  |       |             |
| actin, beta                                                                      | 81822    | <i>ACTB</i>   | -1.34            | .0132 | 0.121186877 |
| actin alpha cardiac 1                                                            | 29275    | <i>ACTC1</i>  | 2.30             | .0000 | 0.000248913 |
| actinin alpha 4                                                                  | 63836    | <i>ACTN4</i>  | -1.62            | .0004 | 0.015327409 |
| a disintegrin and metallopeptidase domain 1a                                     | 56777    | <i>ADAM1A</i> | -1.69            | .0007 | 0.023296301 |
| ADP-ribosylation factor 1                                                        | 64310    | <i>ARF1</i>   | -1.51            | .0042 | 0.06161559  |
| blocked early in transport 1 homolog ( <i>S. cerevisiae</i> ) like               | 54400    | <i>BET1L</i>  | -1.31            | .0707 | 0.321228605 |
| calcineurin binding protein 1                                                    | 94165    | <i>CABIN1</i> | 1.47             | .0000 | 0.004028913 |
| calpain 3                                                                        | 29155    | <i>CAPN3</i>  | -1.06            | .6514 | 0.868611888 |
| small inducible cytokine A4                                                      | 116637   | <i>CCL4</i>   | 1.50             | .0017 | 0.038035447 |
| cofilin 1                                                                        | 29271    | <i>CFL1</i>   | -1.39            | .0163 | 0.137582819 |
| cytotoxic T-lymphocyte-associated protein 4                                      | 63835    | <i>CTLA4</i>  | 1.25             | .0618 | 0.301897804 |
| discs, large homolog 4 ( <i>Drosophila</i> )                                     | 29495    | <i>DLG4</i>   | 1.28             | .0138 | 0.12501336  |
| phenylalkylamine Ca <sup>2+</sup> antagonist (emopamil) binding protein          | 117278   | <i>EBP</i>    | -1.24            | .1023 | 0.394501794 |
| endothelial differentiation, lysophosphatidic acid G-protein-coupled receptor, 2 | 116744   | <i>EDG2</i>   | 1.50             | .0006 | 0.020782669 |
| ephrin A1                                                                        | 94268    | <i>EFNA1</i>  | -1.33            | .0595 | 0.29465518  |
| espin                                                                            | 56227    | <i>ESPN</i>   | -1.65            | .0004 | 0.015327409 |
| fibrinogen, gamma polypeptide                                                    | 24367    | <i>FGG</i>    | -1.79            | .0067 | 0.080887122 |
| protein kinase C and casein kinase substrate in neurons 2                        | 124461   | <i>PACSN2</i> | 1.27             | .0261 | 0.187905149 |
| p21 (CDKN1A)-activated kinase 1                                                  | 29431    | <i>PAK1</i>   | 1.99             | .0000 | 0.001151782 |
| paired box gene 6                                                                | 25509    | <i>PAX6</i>   | -1.72            | .0000 | 0.001014633 |
| protein tyrosine phosphatase, receptor type, F                                   | 360406   | <i>PTPRF</i>  | -1.44            | .0029 | 0.050810807 |
| Rhesus blood group CE and D                                                      | 60414    | <i>RHD</i>    | -1.45            | .0030 | 0.050810807 |
| Arg/Abl-interacting protein Arg BP2                                              | 114901   | <i>SORBS2</i> | 1.20             | .0883 | 0.361834544 |
| transition protein 2                                                             | 24840    | <i>TNP2</i>   | -1.46            | .0025 | 0.048139684 |
| ubiquitin-conjugating enzyme E2I                                                 | 25573    | <i>UBE2I</i>  | 1.53             | .0001 | 0.008104491 |
| ventral anterior homeobox 1                                                      | 64571    | <i>VAX1</i>   | -1.52            | .0001 | 0.007642386 |
| vesicle docking protein                                                          | 56042    | <i>VDP</i>    | -1.33            | .0114 | 0.114843401 |
| <b>Cellular development</b>                                                      |          |               |                  |       |             |
| adducin 2 (beta)                                                                 | 24171    | <i>ADD2</i>   | -1.50            | .0023 | 0.046831092 |
| adrenergic receptor kinase, beta 1                                               | 25238    | <i>ADRBK1</i> | -1.33            | .0048 | 0.067126523 |
| allograft inflammatory factor 1                                                  | 29427    | <i>AIF1</i>   | -1.58            | .0001 | 0.007642386 |
| alanyl (membrane) aminopeptidase                                                 | 81641    | <i>ANPEP</i>  | 1.23             | .0662 | 0.309192141 |
| calcitonin/calcitonin-related polypeptide, alpha                                 | 24241    | <i>CALCA</i>  | 1.57             | .0002 | 0.00960067  |
| small inducible cytokine A4                                                      | 116637   | <i>CCL4</i>   | 1.50             | .0017 | 0.038035447 |
| CCAAT/enhancer binding protein (C/EBP), alpha                                    | 24252    | <i>CEBPA</i>  | -1.53            | .0095 | 0.101978652 |
| cofilin 1                                                                        | 29271    | <i>CFL1</i>   | -1.39            | .0163 | 0.137582819 |
| cytotoxic T-lymphocyte-associated protein 4                                      | 63835    | <i>CTLA4</i>  | 1.25             | .0618 | 0.301897804 |
| discoidin domain receptor family, member 1                                       | 25678    | <i>DDR1</i>   | -1.75            | .0000 | 0.002145778 |
| phenylalkylamine Ca <sup>2+</sup> antagonist (emopamil) binding protein          | 117278   | <i>EBP</i>    | -1.24            | .1023 | 0.394501794 |
| endothelial differentiation, lysophosphatidic acid G-protein-coupled receptor, 2 | 116744   | <i>EDG2</i>   | 1.50             | .0006 | 0.020782669 |
| ephrin A1                                                                        | 94268    | <i>EFNA1</i>  | -1.33            | .0595 | 0.29465518  |
| eukaryotic translation initiation factor 2B, subunit 4 delta                     | 117019   | <i>EIF2B4</i> | -1.32            | .0626 | 0.302985912 |

Table W3. (continued)

| Gene Names                                                                                  | Locus ID | Symbol          | Fold Changes     |       |             |
|---------------------------------------------------------------------------------------------|----------|-----------------|------------------|-------|-------------|
|                                                                                             |          |                 | T + DES LP vs LP | P     | FDR         |
| interleukin 5                                                                               | 24497    | <i>IL5</i>      | -1.52            | .0526 | 0.275768333 |
| potassium inwardly rectifying channel, subfamily J, member 10                               | 29718    | <i>KCNJ10</i>   | 1.57             | .0002 | 0.011445829 |
| neurogenic differentiation 2                                                                | 54276    | <i>NEUROD2</i>  | -1.47            | .0457 | 0.259241663 |
| NK6 transcription factor–related, locus 1 ( <i>Drosophila</i> )                             | 65193    | <i>NKX6-1</i>   | -1.31            | .0144 | 0.128278942 |
| nuclear receptor subfamily 4, group A, member 3                                             | 58853    | <i>NR4A3</i>    | -1.51            | .0383 | 0.233175558 |
| platelet-activating factor acetylhydrolase, isoform 1b, alpha1 subunit                      | 114113   | <i>PAFAH1B3</i> | -1.59            | .0007 | 0.021362381 |
| p21 (CDKN1A)–activated kinase 1                                                             | 29431    | <i>PAK1</i>     | 1.99             | .0000 | 0.001151782 |
| paired box gene 6                                                                           | 25509    | <i>PAX6</i>     | -1.72            | .0000 | 0.001014633 |
| prion protein                                                                               | 24686    | <i>PRNP</i>     | -1.33            | .1183 | 0.42614185  |
| retinoic acid receptor, alpha                                                               | 24705    | <i>RARA</i>     | -1.45            | .0003 | 0.0125346   |
| SNF-related kinase                                                                          | 170837   | <i>SNRK</i>     | -1.68            | .0002 | 0.01079459  |
| zinc finger protein of the cerebellum 1                                                     | 64618    | <i>ZIC1</i>     | -1.54            | .0002 | 0.00960067  |
| <b>Vitamin and mineral metabolism</b>                                                       |          |                 |                  |       |             |
| adrenergic receptor kinase, beta 1                                                          | 25238    | <i>ADRBK1</i>   | -1.33            | .0048 | 0.067126523 |
| calcium channel, voltage-dependent, T type, alpha 1 G subunit                               | 29717    | <i>CACNA1G</i>  | -1.50            | .0002 | 0.011161422 |
| growth hormone–releasing hormone                                                            | 29446    | <i>GHRH</i>     | 1.87             | .0000 | 0.000562125 |
| tyrosine 3-monooxygenase/tryptophan 5-monooxygenase activation protein, epsilon polypeptide | 29753    | <i>YWHAE</i>    | -1.54            | .0014 | 0.034901656 |
| gamma-glutamyl hydrolase                                                                    | 25455    | <i>GGH</i>      | 1.05             | .6924 | 0.88871634  |
| <b>Nucleic acid metabolism</b>                                                              |          |                 |                  |       |             |
| growth hormone–releasing hormone                                                            | 29446    | <i>GHRH</i>     | 1.87             | .0000 | 0.000562125 |
| G protein–coupled receptor 24                                                               | 83567    | <i>MCHR1</i>    | -1.52            | .0002 | 0.00962618  |
| phosphodiesterase 4A                                                                        | 25638    | <i>PDE4A</i>    | -1.55            | .0011 | 0.030023803 |
| heat shock 10 kDa protein 1                                                                 | 25462    | <i>HSPE1</i>    | -1.53            | .0302 | 0.202134203 |
| <b>Cell cycle</b>                                                                           |          |                 |                  |       |             |
| allograft inflammatory factor 1                                                             | 29427    | <i>AIF1</i>     | -1.58            | .0001 | 0.007642386 |
| CCAAT/enhancer binding protein (C/EBP), alpha                                               | 24252    | <i>CEBPA</i>    | -1.53            | .0095 | 0.101978652 |
| cofilin 1                                                                                   | 29271    | <i>CFL1</i>     | -1.39            | .0163 | 0.137582819 |
| cytotoxic T-lymphocyte–associated protein 4                                                 | 63835    | <i>CTLA4</i>    | 1.25             | .0618 | 0.301897804 |
| aspartyl-tRNA synthetase                                                                    | 116483   | <i>DARS</i>     | -1.43            | .0353 | 0.221986221 |
| interleukin 5                                                                               | 24497    | <i>IL5</i>      | -1.52            | .0526 | 0.275768333 |
| nuclear receptor subfamily 4, group A, member 3                                             | 58853    | <i>NR4A3</i>    | -1.51            | .0383 | 0.233175558 |
| p21 (CDKN1A)–activated kinase 1                                                             | 29431    | <i>PAK1</i>     | 1.99             | .0000 | 0.001151782 |
| paired box gene 6                                                                           | 25509    | <i>PAX6</i>     | -1.72            | .0000 | 0.001014633 |
| protein tyrosine phosphatase, receptor type, F                                              | 360406   | <i>PTPRF</i>    | -1.44            | .0029 | 0.050810807 |
| tyrosine 3-monooxygenase/tryptophan 5-monooxygenase activation protein, epsilon polypeptide | 29753    | <i>YWHAE</i>    | -1.54            | .0014 | 0.034901656 |
| <b>Cell death</b>                                                                           |          |                 |                  |       |             |
| small inducible cytokine A4                                                                 | 116637   | <i>CCL4</i>     | 1.50             | .0017 | 0.038035447 |
| interleukin 5                                                                               | 24497    | <i>IL5</i>      | -1.52            | .0526 | 0.275768333 |
| NK6 transcription factor–related, locus 1 ( <i>Drosophila</i> )                             | 65193    | <i>NKX6-1</i>   | -1.31            | .0144 | 0.128278942 |
| ornithine decarboxylase antizyme 1                                                          | 25502    | <i>OAZ1</i>     | -1.61            | .0040 | 0.059747718 |
| prolyl 4-hydroxylase, beta polypeptide                                                      | 25506    | <i>P4HB</i>     | -1.29            | .0491 | 0.266073897 |
| prion protein                                                                               | 24686    | <i>PRNP</i>     | -1.33            | .1183 | 0.42614185  |
| retinoic acid receptor, alpha                                                               | 24705    | <i>RARA</i>     | -1.45            | .0003 | 0.0125346   |
| <b>Cellular compromise</b>                                                                  |          |                 |                  |       |             |
| adducin 2 (beta)                                                                            | 24171    | <i>ADD2</i>     | -1.50            | .0023 | 0.046831092 |
| cofilin 1                                                                                   | 29271    | <i>CFL1</i>     | -1.39            | .0163 | 0.137582819 |
| calponin 1                                                                                  | 65204    | <i>CNN1</i>     | -1.04            | .7878 | 0.930382649 |
| cytotoxic T-lymphocyte–associated protein 4                                                 | 63835    | <i>CTLA4</i>    | 1.25             | .0618 | 0.301897804 |
| ephrin A1                                                                                   | 94268    | <i>EFNA1</i>    | -1.33            | .0595 | 0.29465518  |
| G-protein–coupled receptor 37                                                               | 117549   | <i>GPR37</i>    | -1.24            | .0689 | 0.316311201 |
| heat shock 10 kDa protein 1                                                                 | 25462    | <i>HSPE1</i>    | -1.53            | .0302 | 0.202134203 |
| interleukin 5                                                                               | 24497    | <i>IL5</i>      | -1.52            | .0526 | 0.275768333 |
| potassium inwardly rectifying channel, subfamily J, member 10                               | 29718    | <i>KCNJ10</i>   | 1.57             | .0002 | 0.011445829 |
| mucosal vascular addressin cell adhesion molecule 1                                         | 54266    | <i>MADCAM1</i>  | -1.53            | .0051 | 0.068231134 |
| p21 (CDKN1A)–activated kinase 1                                                             | 29431    | <i>PAK1</i>     | 1.99             | .0000 | 0.001151782 |
| prion protein                                                                               | 24686    | <i>PRNP</i>     | -1.33            | .1183 | 0.42614185  |
| synuclein, gamma                                                                            | 64347    | <i>SNCG</i>     | -1.83            | .0014 | 0.034901656 |
| Arg/Abl–interacting protein Arg BP2                                                         | 114901   | <i>SORBS2</i>   | 1.20             | .0883 | 0.361834544 |
| <b>Gene expression</b>                                                                      |          |                 |                  |       |             |
| CCAAT/enhancer binding protein (C/EBP), alpha                                               | 24252    | <i>CEBPA</i>    | -1.53            | .0095 | 0.101978652 |
| Cbp/p300–interacting transactivator with Glu/Asp–rich carboxy-terminal domain 1             | 64466    | <i>CITED1</i>   | -1.53            | .0019 | 0.042644963 |
| ddx5 gene                                                                                   | 287765   | <i>DDX5</i>     | -1.27            | .1781 | 0.520336467 |
| glucocorticoid modulatory element binding protein 2                                         | 83635    | <i>GMEB2</i>    | 1.44             | .0013 | 0.033527564 |
| hairy and enhancer of split 2 ( <i>Drosophila</i> )                                         | 29567    | <i>HES2</i>     | -1.66            | .0001 | 0.008055371 |
| interleukin 5                                                                               | 24497    | <i>IL5</i>      | -1.52            | .0526 | 0.275768333 |

Table W3. (continued)

| Gene Names                                                                                  | Locus ID | Symbol         | Fold Changes     |       |                  | FDR |
|---------------------------------------------------------------------------------------------|----------|----------------|------------------|-------|------------------|-----|
|                                                                                             |          |                | T + DES LP vs LP | P     | T + DES LP vs LP |     |
| interleukin enhancer binding factor 3                                                       | 84472    | <i>ILF3</i>    | -1.45            | .0041 | 0.060465974      |     |
| neurogenic differentiation 2                                                                | 54276    | <i>NEUROD2</i> | -1.47            | .0457 | 0.259241663      |     |
| nuclear factor I/C                                                                          | 29228    | <i>NFIC</i>    | -1.54            | .0000 | 0.001390745      |     |
| nuclear receptor subfamily 3, group C, member 2                                             | 25672    | <i>NR3C2</i>   | 1.57             | .0025 | 0.048296067      |     |
| nuclear receptor subfamily 4, group A, member 3                                             | 58853    | <i>NR4A3</i>   | -1.51            | .0383 | 0.23317558       |     |
| p21 (CDKN1A)-activated kinase 1                                                             | 29431    | <i>PAK1</i>    | 1.99             | .0000 | 0.001151782      |     |
| paired box gene 6                                                                           | 25509    | <i>PAX6</i>    | -1.72            | .0000 | 0.001014633      |     |
| paired box gene 8                                                                           | 81819    | <i>PAX8</i>    | -1.50            | .0027 | 0.049209986      |     |
| protein kinase N1                                                                           | 29355    | <i>PKN1</i>    | 1.51             | .0001 | 0.005817694      |     |
| prion protein                                                                               | 24686    | <i>PRNP</i>    | -1.33            | .1183 | 0.42614185       |     |
| retinoic acid receptor, alpha                                                               | 24705    | <i>RARA</i>    | -1.45            | .0003 | 0.0125346        |     |
| retinoblastoma binding protein 7                                                            | 83712    | <i>RBBP7</i>   | -1.15            | .2769 | 0.626562643      |     |
| suppression of tumorigenicity 18                                                            | 266680   | <i>ST18</i>    | 1.16             | .3190 | 0.656804744      |     |
| telomerase-associated protein 1                                                             | 64523    | <i>TEP1</i>    | -1.53            | .0024 | 0.047008762      |     |
| ubiquitin A-52 residue ribosomal protein fusion product 1                                   | 64156    | <i>UBA52</i>   | -1.94            | .0001 | 0.004893344      |     |
| tyrosine 3-monooxygenase/tryptophan 5-monooxygenase activation protein, epsilon polypeptide | 29753    | <i>YWHAE</i>   | -1.54            | .0014 | 0.034901656      |     |
| <b>Amino acid metabolism</b>                                                                |          |                |                  |       |                  |     |
| adrenergic receptor kinase, beta 1                                                          | 25238    | <i>ADRBK1</i>  | -1.33            | .0048 | 0.067126523      |     |
| CCAAT/enhancer binding protein (C/EBP), alpha                                               | 24252    | <i>CEBPA</i>   | -1.53            | .0095 | 0.101978652      |     |
| glycine cleavage system protein H (aminomethyl carrier)                                     | 171133   | <i>GCSH</i>    | -1.43            | .0131 | 0.120934801      |     |
| gamma-glutamyl hydrolase                                                                    | 25455    | <i>GGH</i>     | 1.05             | .6924 | 0.88871634       |     |
| glycogen synthase kinase 3 alpha                                                            | 50686    | <i>GSK3A</i>   | -1.27            | .0048 | 0.066546045      |     |
| prolyl 4-hydroxylase, beta polypeptide                                                      | 25506    | <i>P4HB</i>    | -1.29            | .0491 | 0.266073897      |     |
| p21 (CDKN1A)-activated kinase 1                                                             | 29431    | <i>PAK1</i>    | 1.99             | .0000 | 0.001151782      |     |
| paired box gene 8                                                                           | 81819    | <i>PAX8</i>    | -1.50            | .0027 | 0.049209986      |     |
| protein kinase N1                                                                           | 29355    | <i>PKN1</i>    | 1.51             | .0001 | 0.005817694      |     |
| <b>Post-translational modification</b>                                                      |          |                |                  |       |                  |     |
| adrenergic receptor kinase, beta 1                                                          | 25238    | <i>ADRBK1</i>  | -1.33            | .0048 | 0.067126523      |     |
| glycine cleavage system protein H (aminomethyl carrier)                                     | 171133   | <i>GCSH</i>    | -1.43            | .0131 | 0.120934801      |     |
| glycogen synthase kinase 3 alpha                                                            | 50686    | <i>GSK3A</i>   | -1.27            | .0048 | 0.066546045      |     |
| prolyl 4-hydroxylase, beta polypeptide                                                      | 25506    | <i>P4HB</i>    | -1.29            | .0491 | 0.266073897      |     |
| p21 (CDKN1A)-activated kinase 1                                                             | 29431    | <i>PAK1</i>    | 1.99             | .0000 | 0.001151782      |     |
| protein kinase N1                                                                           | 29355    | <i>PKN1</i>    | 1.51             | .0001 | 0.005817694      |     |
| <b>Carbohydrate metabolism</b>                                                              |          |                |                  |       |                  |     |
| apolipoprotein A-V                                                                          | 140638   | <i>APOA5</i>   | -1.43            | .0022 | 0.045371928      |     |
| CCAAT/enhancer binding protein (C/EBP), alpha                                               | 24252    | <i>CEBPA</i>   | -1.53            | .0095 | 0.101978652      |     |
| growth hormone-releasing hormone                                                            | 29446    | <i>GHRH</i>    | 1.87             | .0000 | 0.000562125      |     |
| guanine nucleotide binding protein, alpha z subunit                                         | 25740    | <i>GNAZ</i>    | 1.46             | .0041 | 0.060465974      |     |
| neuromedin B receptor                                                                       | 25264    | <i>NMBR</i>    | 1.66             | .0005 | 0.017227903      |     |
| prion protein                                                                               | 24686    | <i>PRNP</i>    | -1.33            | .1183 | 0.42614185       |     |
| <b>Cellular response to therapeutics</b>                                                    |          |                |                  |       |                  |     |
| CCAAT/enhancer binding protein (C/EBP), alpha                                               | 24252    | <i>CEBPA</i>   | -1.53            | .0095 | 0.101978652      |     |
| <b>DNA replication, recombination, and repair</b>                                           |          |                |                  |       |                  |     |
| cofilin 1                                                                                   | 29271    | <i>CFL1</i>    | -1.39            | .0163 | 0.137582819      |     |
| prion protein                                                                               | 24686    | <i>PRNP</i>    | -1.33            | .1183 | 0.42614185       |     |
| <b>Drug metabolism</b>                                                                      |          |                |                  |       |                  |     |
| apolipoprotein A-V                                                                          | 140638   | <i>APOA5</i>   | -1.43            | .0022 | 0.045371928      |     |
| phenylalkylamine Ca <sup>2+</sup> antagonist (emopamil) binding protein                     | 117278   | <i>EBP</i>     | -1.24            | .1023 | 0.394501794      |     |
| gamma-glutamyl hydrolase                                                                    | 25455    | <i>GGH</i>     | 1.05             | .6924 | 0.88871634       |     |
| growth hormone-releasing hormone                                                            | 29446    | <i>GHRH</i>    | 1.87             | .0000 | 0.000562125      |     |
| insulin-like 6                                                                              | 50546    | <i>IL1RAP</i>  | 1.56             | .0002 | 0.01079459       |     |
| fertility protein SP22                                                                      | 117287   | <i>PARK7</i>   | -1.22            | .2198 | 0.566510451      |     |
| prion protein                                                                               | 24686    | <i>PRNP</i>    | -1.33            | .1183 | 0.42614185       |     |
| <b>Energy production</b>                                                                    |          |                |                  |       |                  |     |
| heat shock 10 kDa protein 1                                                                 | 25462    | <i>HSPE1</i>   | -1.53            | .0302 | 0.202134203      |     |
| Pyruvate carboxylase                                                                        | 25104    | <i>PC</i>      | -1.68            | .0005 | 0.017227903      |     |
| <b>Lipid metabolism</b>                                                                     |          |                |                  |       |                  |     |
| adrenergic receptor, alpha 2c                                                               | 24175    | <i>ADRA2C</i>  | -1.35            | .0729 | 0.3262758        |     |
| adrenergic receptor kinase, beta 1                                                          | 25238    | <i>ADRBK1</i>  | -1.33            | .0048 | 0.067126523      |     |
| apolipoprotein A-V                                                                          | 140638   | <i>APOA5</i>   | -1.43            | .0022 | 0.045371928      |     |
| apolipoprotein C-I                                                                          | 25292    | <i>APOC1</i>   | -1.45            | .0040 | 0.060048723      |     |
| ADP-ribosylation factor 1                                                                   | 64310    | <i>ARF1</i>    | -1.51            | .0042 | 0.06161559       |     |
| small inducible cytokine A4                                                                 | 116637   | <i>CCL4</i>    | 1.50             | .0017 | 0.038035447      |     |
| CCAAT/enhancer binding protein (C/EBP), alpha                                               | 24252    | <i>CEBPA</i>   | -1.53            | .0095 | 0.101978652      |     |
| cytochrome P450, 4a12                                                                       | 266674   | <i>CYP4A22</i> | 1.29             | .0127 | 0.118852704      |     |
| phenylalkylamine Ca <sup>2+</sup> antagonist (emopamil) binding protein                     | 117278   | <i>EBP</i>     | -1.24            | .1023 | 0.394501794      |     |
| coagulation factor X                                                                        | 29243    | <i>F10</i>     | -1.80            | .0004 | 0.016178933      |     |
| growth hormone-releasing hormone                                                            | 29446    | <i>GHRH</i>    | 1.87             | .0000 | 0.000562125      |     |

**Table W3.** (continued)

| Gene Names                                                                                  | Locus ID | Symbol          | Fold Changes     |       |             |
|---------------------------------------------------------------------------------------------|----------|-----------------|------------------|-------|-------------|
|                                                                                             |          |                 | T + DES LP vs LP | P     | FDR         |
| growth hormone–releasing hormone receptor                                                   | 25321    | <i>GHRHR</i>    | -1.59            | .0255 | 0.186284598 |
| CCA2 protein                                                                                | 246211   | <i>HSD3B7</i>   | -1.14            | .2909 | 0.639015905 |
| interleukin 5                                                                               | 24497    | <i>IL5</i>      | -1.52            | .0526 | 0.275768333 |
| platelet-activating factor acetylhydrolase, isoform 1b, alpha1 subunit                      | 114113   | <i>PAFAH1B3</i> | -1.59            | .0007 | 0.021362381 |
| phosphatidylinositol-4-phosphate 5-kinase, type II, alpha                                   | 116723   | <i>PIP5K2A</i>  | -1.54            | .0028 | 0.050001834 |
| <b>Molecular transport</b>                                                                  |          |                 |                  |       |             |
| adducin 2 (beta)                                                                            | 24171    | <i>ADD2</i>     | -1.50            | .0023 | 0.046831092 |
| apolipoprotein A-V                                                                          | 140638   | <i>APOA5</i>    | -1.43            | .0022 | 0.045371928 |
| apolipoprotein C-I                                                                          | 25292    | <i>APOC1</i>    | -1.45            | .0040 | 0.060048723 |
| ADP-ribosylation factor 1                                                                   | 64310    | <i>ARF1</i>     | -1.51            | .0042 | 0.06161559  |
| ADP-ribosylation factor 3                                                                   | 140940   | <i>ARF3</i>     | -1.73            | .0015 | 0.035552435 |
| ATPase, H <sup>+</sup> transporting, V1 subunit F                                           | 116664   | <i>ATP6V1F</i>  | 1.82             | .0000 | 0.002117528 |
| calcium channel, voltage-dependent, T type, alpha 1 G subunit                               | 29717    | <i>CACNA1G</i>  | -1.50            | .0002 | 0.011161422 |
| CCAAT/enhancer binding protein (C/EBP), alpha                                               | 24252    | <i>CEBPA</i>    | -1.53            | .0095 | 0.101978652 |
| cofilin 1                                                                                   | 29271    | <i>CFL1</i>     | -1.39            | .0163 | 0.137582819 |
| gamma-glutamyl hydrolase                                                                    | 25455    | <i>GGH</i>      | 1.05             | .6924 | 0.88871634  |
| growth hormone–releasing hormone                                                            | 29446    | <i>GHRH</i>     | 1.87             | .0000 | 0.000562125 |
| guanine nucleotide binding protein, alpha z subunit                                         | 25740    | <i>GNAZ</i>     | 1.46             | .0041 | 0.060465974 |
| interleukin 5                                                                               | 24497    | <i>IL5</i>      | -1.52            | .0526 | 0.275768333 |
| potassium voltage-gated channel, Shaw-related subfamily, member 1                           | 25327    | <i>KCNC1</i>    | 1.88             | .0000 | 0.001278795 |
| potassium voltage-gated channel, Shaw-related subfamily, member 3                           | 117101   | <i>KCNC3</i>    | 1.28             | .0499 | 0.267188376 |
| potassium inwardly rectifying channel, subfamily J, member 10                               | 29718    | <i>KCNJ10</i>   | 1.57             | .0002 | 0.011445829 |
| potassium large conductance calcium-activated channel, subfamily M, beta member 1           | 29747    | <i>KCNMB1</i>   | 1.45             | .0016 | 0.037292397 |
| G protein-coupled receptor 24                                                               | 83567    | <i>MCHR1</i>    | -1.52            | .0002 | 0.00962618  |
| neuromedin B receptor                                                                       | 25264    | <i>NMBR</i>     | 1.66             | .0005 | 0.017227903 |
| nuclear receptor subfamily 3, group C, member 2                                             | 25672    | <i>NR3C2</i>    | 1.57             | .0025 | 0.048296067 |
| ornithine decarboxylase antizyme 1                                                          | 25502    | <i>OAZ1</i>     | -1.61            | .0040 | 0.059747718 |
| fertility protein SP22                                                                      | 117287   | <i>PARK7</i>    | -1.22            | .2198 | 0.566510451 |
| paired box gene 8                                                                           | 81819    | <i>PAX8</i>     | -1.50            | .0027 | 0.049209986 |
| phosphodiesterase 4A                                                                        | 25638    | <i>PDE4A</i>    | -1.55            | .0011 | 0.030023803 |
| phosphatidylinositol-4-phosphate 5-kinase, type II, alpha                                   | 116723   | <i>PIP5K2A</i>  | -1.54            | .0028 | 0.050001834 |
| phospholipase C, beta 3                                                                     | 29322    | <i>PLCB3</i>    | -1.54            | .0020 | 0.043467607 |
| transmembrane 4 superfamily member 11                                                       | 64364    | <i>PLLP</i>     | -1.89            | .0001 | 0.007928851 |
| RAB10, member RAS oncogene family                                                           | 50993    | <i>RAB10</i>    | -1.26            | .1155 | 0.421950743 |
| vesicle docking protein                                                                     | 56042    | <i>VDP</i>      | -1.33            | .0114 | 0.114843401 |
| protein kinase, lysine-deficient 1                                                          | 116477   | <i>WNK1</i>     | -1.23            | .0401 | 0.239581758 |
| tyrosine 3-monooxygenase/tryptophan 5-monooxygenase activation protein, epsilon polypeptide | 29753    | <i>YWHAE</i>    | -1.54            | .0014 | 0.034901656 |
| <b>Protein degradation</b>                                                                  |          |                 |                  |       |             |
| alanyl (membrane) aminopeptidase                                                            | 81641    | <i>ANPEP</i>    | 1.23             | .0662 | 0.309192141 |
| calpain 3                                                                                   | 29155    | <i>CAPN3</i>    | -1.06            | .6514 | 0.868611888 |
| F-box only protein 2                                                                        | 85273    | <i>FBXO2</i>    | -1.42            | .0115 | 0.114843401 |
| proprotein convertase subtilisin/kexin type 3                                               | 54281    | <i>FURIN</i>    | -1.46            | .0026 | 0.048296067 |
| ubiquitin A-52 residue ribosomal protein fusion product 1                                   | 64156    | <i>UBA52</i>    | -1.94            | .0001 | 0.004893344 |
| <b>Protein synthesis</b>                                                                    |          |                 |                  |       |             |
| ubiquitin A-52 residue ribosomal protein fusion product 1                                   | 64156    | <i>UBA52</i>    | -1.94            | .0001 | 0.004893344 |
| alanyl (membrane) aminopeptidase                                                            | 81641    | <i>ANPEP</i>    | 1.23             | .0662 | 0.309192141 |
| proprotein convertase subtilisin/kexin type 3                                               | 54281    | <i>FURIN</i>    | -1.46            | .0026 | 0.048296067 |
| F-box only protein 2                                                                        | 85273    | <i>FBXO2</i>    | -1.42            | .0115 | 0.114843401 |
| calpain 3                                                                                   | 29155    | <i>CAPN3</i>    | -1.06            | .6514 | 0.868611888 |
| eukaryotic translation initiation factor 2B, subunit 4 delta                                | 117019   | <i>EIF2B4</i>   | -1.32            | .0626 | 0.302985912 |
| aspartyl-tRNA synthetase                                                                    | 116483   | <i>DARS</i>     | -1.43            | .0353 | 0.221986221 |
| ribosomal protein L41                                                                       | 124440   | <i>RPL41</i>    | 1.11             | .5675 | 0.833181167 |
| ribosomal protein S27                                                                       | 94266    | <i>RPS27</i>    | -1.90            | .0001 | 0.00504934  |
| ribosomal protein L22                                                                       | 81768    | <i>RPL22</i>    | -1.28            | .1257 | 0.438278138 |
| ribosomal protein L24                                                                       | 64307    | <i>RPL24</i>    | -1.21            | .2217 | 0.567754925 |
| ribosomal protein L4                                                                        | 64302    | <i>RPL4</i>     | -1.42            | .0425 | 0.248528309 |
| <b>Protein trafficking</b>                                                                  |          |                 |                  |       |             |
| ADP-ribosylation factor 1                                                                   | 64310    | <i>ARF1</i>     | -1.51            | .0042 | 0.06161559  |
| cofilin 1                                                                                   | 29271    | <i>CFL1</i>     | -1.39            | .0163 | 0.137582819 |
| vesicle docking protein                                                                     | 56042    | <i>VDP</i>      | -1.33            | .0114 | 0.114843401 |
| ADP-ribosylation factor 3                                                                   | 140940   | <i>ARF3</i>     | -1.73            | .0015 | 0.035552435 |
| RAB10, member RAS oncogene family                                                           | 50993    | <i>RAB10</i>    | -1.26            | .1155 | 0.421950743 |



Table W3. (continued)

| Gene Names                                                                                 | Locus ID | Symbol                           | Fold Changes     |       |             |
|--------------------------------------------------------------------------------------------|----------|----------------------------------|------------------|-------|-------------|
|                                                                                            |          |                                  | T + DES LP vs LP | P     | FDR         |
| protein tyrosine phosphatase, receptor type, F                                             | 360406   | <i>PTPRF</i>                     | -1.44            | .0029 | 0.050810807 |
| <b>RNA damage and repair</b>                                                               |          |                                  |                  |       |             |
| telomerase-associated protein 1                                                            | 64523    | <i>TEP1</i>                      | -1.53            | .0024 | 0.047008762 |
| <b>RNA post-transcriptional modification</b>                                               |          |                                  |                  |       |             |
| telomerase-associated protein 1                                                            | 64523    | <i>TEP1</i>                      | -1.53            | .0024 | 0.047008762 |
| prion protein                                                                              | 24686    | <i>PRNP</i>                      | -1.33            | .1183 | 0.42614185  |
| <b>Small molecule biochemistry</b>                                                         |          |                                  |                  |       |             |
| glycine cleavage system protein H (aminomethyl carrier)                                    | 171133   | <i>GCSH</i>                      | -1.43            | .0131 | 0.120934801 |
| neuromedin B receptor                                                                      | 25264    | <i>NMBR</i>                      | 1.66             | .0005 | 0.017227903 |
| guanine nucleotide binding protein, alpha z subunit                                        | 25740    | <i>GNAZ</i>                      | 1.46             | .0041 | 0.060465974 |
| nuclear receptor subfamily 3, group C, member 2                                            | 25672    | <i>NR3C2</i>                     | 1.57             | .0025 | 0.048296067 |
| apolipoprotein C-I                                                                         | 25292    | <i>APOC1</i>                     | -1.45            | .0040 | 0.060048723 |
| apolipoprotein A-V                                                                         | 140638   | <i>APOA5</i>                     | -1.43            | .0022 | 0.045371928 |
| platelet-activating factor acetylhydrolase, isoform 1b, alpha1 subunit                     | 114113   | <i>PAFAH1B3</i>                  | -1.59            | .0007 | 0.021362381 |
| prion protein                                                                              | 24686    | <i>PRNP</i>                      | -1.33            | .1183 | 0.42614185  |
| ornithine decarboxylase antizyme 1                                                         | 25502    | <i>OAZ1</i>                      | -1.61            | .0040 | 0.059747718 |
| phosphatidylinositol-4-phosphate 5-kinase, type II, alpha                                  | 116723   | <i>PIP5K2A</i>                   | -1.54            | .0028 | 0.050001834 |
| CCA2 protein                                                                               | 246211   | <i>HSD3B7</i>                    | -1.14            | .2909 | 0.639015905 |
| interleukin 5                                                                              | 24497    | <i>IL5</i>                       | -1.52            | .0526 | 0.275768333 |
| aspartyl-tRNA synthetase                                                                   | 116483   | <i>DARS</i>                      | -1.43            | .0353 | 0.221986221 |
| adrenergic receptor, alpha 2c                                                              | 24175    | <i>ADRA2C</i>                    | -1.35            | .0729 | 0.3262758   |
| cytochrome P450, 4a12                                                                      | 266674   | <i>CYP4A22</i>                   | 1.29             | .0127 | 0.118852704 |
| coagulation factor X                                                                       | 29243    | <i>F10</i>                       | -1.80            | .0004 | 0.016178933 |
| heat shock 10 kDa protein 1                                                                | 25462    | <i>HSPE1</i>                     | -1.53            | .0302 | 0.202134203 |
| paired box gene 8                                                                          | 81819    | <i>PAX8</i>                      | -1.50            | .0027 | 0.049209986 |
| phospholipase C, beta 3                                                                    | 29322    | <i>PLCB3</i>                     | -1.54            | .0020 | 0.043467607 |
| CCAAT/enhancer binding protein (C/EBP), alpha                                              | 24252    | <i>CEBPA</i>                     | -1.53            | .0095 | 0.101978652 |
| gamma-glutamyl hydrolase                                                                   | 25455    | <i>GGH</i>                       | 1.05             | .6924 | 0.88871634  |
| prolyl 4-hydroxylase, beta polypeptide                                                     | 25506    | <i>P4HB</i>                      | -1.29            | .0491 | 0.266073897 |
| fertility protein SP22                                                                     | 117287   | <i>PARK7</i>                     | -1.22            | .2198 | 0.566510451 |
| phenylalkylamine Ca <sup>2+</sup> antagonist (emopamil) binding protein                    | 117278   | <i>EBP</i>                       | -1.24            | .1023 | 0.394501794 |
| ADP-ribosylation factor 1                                                                  | 64310    | <i>ARF1</i>                      | -1.51            | .0042 | 0.06161559  |
| acetylcholinesterase                                                                       | 83817    | <i>ACHE</i>                      | -1.61            | .0009 | 0.026111212 |
| adrenergic receptor kinase, beta 1                                                         | 25238    | <i>ADRBK1</i>                    | -1.33            | .0048 | 0.067126523 |
| small inducible cytokine A4                                                                | 116637   | <i>CCL4</i>                      | 1.50             | .0017 | 0.038035447 |
| growth hormone-releasing hormone                                                           | 29446    | <i>GHRH</i>                      | 1.87             | .0000 | 0.000562125 |
| glycogen synthase kinase 3 alpha                                                           | 50686    | <i>GSK3A</i>                     | -1.27            | .0048 | 0.066546045 |
| insulin-like 6                                                                             | 50546    | <i>IL1RAP</i>                    | 1.56             | .0002 | 0.01079459  |
| G protein-coupled receptor 24                                                              | 83567    | <i>MCHR1</i>                     | -1.52            | .0002 | 0.00962618  |
| p21 (CDKN1A)-activated kinase 1                                                            | 29431    | <i>PAK1</i>                      | 1.99             | .0000 | 0.001151782 |
| phosphodiesterase 4A                                                                       | 25638    | <i>PDE4A</i>                     | -1.55            | .0011 | 0.030023803 |
| protein kinase N1                                                                          | 29355    | <i>PKN1</i>                      | 1.51             | .0001 | 0.005817694 |
| sulfotransferase family, cytosolic, 1C, member 2                                           | 171072   | <i>SULT1C2</i>                   | 1.40             | .0066 | 0.080018243 |
| <b>Others/unclassified</b>                                                                 |          |                                  |                  |       |             |
| acetylcholinesterase                                                                       | 83817    | <i>ACHE</i>                      | -1.61            | .0009 | 0.026111212 |
| A kinase (PRKA) anchor protein 14                                                          | 60332    | <i>AKAP14</i>                    | 1.75             | .0000 | 0.000345513 |
| ADP-ribosylation factor 5                                                                  | 79117    | <i>ARF5</i>                      | 1.18             | .1270 | 0.441864518 |
| ATP synthase, H <sup>+</sup> transporting, mitochondrial F <sub>1</sub> complex, O subunit | 192241   | <i>ATP5O</i>                     | -1.21            | .1429 | 0.469959614 |
| barrier to autointegration factor 1                                                        | 114087   | <i>BANF1</i>                     | 1.94             | .0000 | 0.000627148 |
| complement component 1, q subcomponent, beta polypeptide                                   | 29687    | <i>CIQB</i>                      | 1.33             | .0055 | 0.071144019 |
| calcium channel, voltage-dependent, alpha II subunit                                       | 56827    | <i>CACNAII</i>                   | -1.49            | .0013 | 0.033306477 |
| calcitonin/calcitonin-related polypeptide, alpha                                           | 24241    | <i>CALCA</i>                     | 1.57             | .0002 | 0.00960067  |
| steroid-sensitive gene 1                                                                   | 64387    | <i>CCDC80</i>                    | -1.68            | .0010 | 0.027773162 |
| caudal type homeobox 1                                                                     | 171042   | <i>CDX1 (includes EG:171042)</i> | -1.38            | .0779 | 0.339542448 |
| chloride channel Kb                                                                        | 79430    | <i>CLCNKB</i>                    | 1.34             | .0202 | 0.162131033 |
| cytochrome c oxidase subunit IV isoform 1                                                  | 29445    | <i>COX4I1</i>                    | 2.01             | .0000 | 0.000345513 |
| cleavage and polyadenylation-specific factor 4                                             | 252943   | <i>CPSF4</i>                     | -1.47            | .0363 | 0.225382474 |
| upstream of NRAS                                                                           | 117180   | <i>CSDE1</i>                     | -1.48            | .0027 | 0.049042265 |
| casein kinase 1, alpha 1                                                                   | 113927   | <i>CSNK1A1</i>                   | -1.48            | .0010 | 0.027890942 |
| chondroitin sulfate proteoglycan 5                                                         | 50568    | <i>CSPG5</i>                     | 1.42             | .0130 | 0.12061056  |
| cytochrome P450, family 2, subfamily c, polypeptide 7                                      | 29298    | <i>CYP2C9</i>                    | 1.52             | .0030 | 0.050810807 |
| dipeptidase 1 (renal)                                                                      | 94199    | <i>DPEP1</i>                     | -1.15            | .2356 | 0.588068112 |
| putative pheromone receptor Go-VN13C                                                       | 286986   | <i>EG665255</i>                  | -1.30            | .0159 | 0.136403128 |
| carboxylesterase 1                                                                         | 29225    | <i>ES22</i>                      | -1.53            | .0138 | 0.12501336  |
| Ena-vasodilator-stimulated phosphoprotein                                                  | 79115    | <i>EVL</i>                       | -1.48            | .0006 | 0.020979393 |
| Fas apoptotic inhibitory molecule 2                                                        | 246274   | <i>FAIM2</i>                     | 1.74             | .0000 | 0.000313065 |
| gap junction membrane channel protein beta 4                                               | 117055   | <i>GJB4</i>                      | -1.62            | .0026 | 0.048592575 |
| galectin-related interfiber protein                                                        | 117130   | <i>GRIFIN</i>                    | -1.14            | .1826 | 0.525238789 |

**Table W3.** (continued)

| Gene Names                                                                  | Locus ID | Symbol                          | Fold Changes            |                         |                         | FDR |
|-----------------------------------------------------------------------------|----------|---------------------------------|-------------------------|-------------------------|-------------------------|-----|
|                                                                             |          |                                 | T + DES LP <i>vs</i> LP | T + DES LP <i>vs</i> LP | T + DES LP <i>vs</i> LP |     |
| general transcription factor IIa 2                                          | 83828    | <i>GTF2A2</i>                   | -1.52                   | .0018                   | 0.040904546             |     |
| 3-hydroxyisobutyrate dehydrogenase                                          | 63938    | <i>HIBADH</i>                   | -1.63                   | .0092                   | 0.099998918             |     |
| neural visinin-like Ca <sup>2+</sup> -binding protein type 3                | 50871    | <i>HPCAL1</i>                   | -1.39                   | .0014                   | 0.034901656             |     |
| hydroxy-delta-5-steroid dehydrogenase, 3 beta-andosteroid delta-isomerase 1 | 29632    | <i>HSD3B2(includesEG:3284)</i>  | 1.59                    | .0132                   | 0.121186877             |     |
| interferon, alpha-inducible protein 27-like                                 | 170512   | <i>IFI27</i>                    | -1.33                   | .0082                   | 0.092474595             |     |
| potassium voltage-gated channel, shaker-related subfamily, beta member 1    | 29737    | <i>KCNAB1</i>                   | -1.47                   | .0009                   | 0.026111212             |     |
| potassium channel, subfamily K, member 9                                    | 84429    | <i>KCNK9</i>                    | 2.54                    | .0000                   | 3.18e-05                |     |
| preoptic regulatory factor-2                                                | 286903   | <i>KIAA1688</i>                 | -1.86                   | .0000                   | 0.001310057             |     |
| epididymal retinoic acid-binding protein                                    | 29552    | <i>LCN5</i>                     | -1.33                   | .1328                   | 0.451496546             |     |
| leptin receptor overlapping transcript                                      | 56766    | <i>LEPROT</i>                   | 1.23                    | .0800                   | 0.344030409             |     |
| Alpha-1,6-mannosyl-glycoprotein2-beta-N-acetylglucosaminyltransferase       | 94273    | <i>MGAT2</i>                    | -1.49                   | .0003                   | 0.013861053             |     |
| membrane protein, palmitoylated 2 (MAGUK p55 subfamily member 2)            | 85275    | <i>MPP2</i>                     | -1.54                   | .0013                   | 0.033527564             |     |
| membrane protein, palmitoylated 3 (MAGUK p55 subfamily member 3)            | 114202   | <i>MPP3</i>                     | -1.78                   | .0000                   | 0.00238426              |     |
| myosin ID                                                                   | 25485    | <i>MYO1D</i>                    | -1.86                   | .0000                   | 0.002259596             |     |
| myosin IE                                                                   | 25484    | <i>MYO1E</i>                    | -1.49                   | .0045                   | 0.063968949             |     |
| N-acetyltransferase 8 (camello-like)                                        | 64570    | <i>NAT8</i>                     | 1.60                    | .0005                   | 0.018001605             |     |
| nuclear factor I/X                                                          | 81524    | <i>NFIX</i>                     | -1.40                   | .0020                   | 0.043375551             |     |
| phosphodiesterase 4C, cAMP-specific                                         | 290646   | <i>PDE4C</i>                    | -1.56                   | .0015                   | 0.035439407             |     |
| phosphofructokinase, muscle                                                 | 65152    | <i>PFKM</i>                     | 1.41                    | .0036                   | 0.05720289              |     |
| phospholipase C, delta 4                                                    | 140693   | <i>PLCD4</i>                    | 1.06                    | .5888                   | 0.839859691             |     |
| pregnancy upregulated nonubiquitously expressed CaM kinase                  | 29660    | <i>PNCK</i>                     | 1.82                    | .0000                   | 0.004388703             |     |
| protein phosphatase 1, regulatory subunit 10                                | 65045    | <i>PPP1R10</i>                  | -1.45                   | .0110                   | 0.112064665             |     |
| protein phosphatase 3, catalytic subunit, beta isoform                      | 24675    | <i>PPP3CB</i>                   | -1.05                   | .6773                   | 0.882757484             |     |
| prolactin-like protein L                                                    | 171556   | <i>PRLPL</i>                    | 1.11                    | .3118                   | 0.65353078              |     |
| PR-Vbeta1                                                                   | 498341   | <i>PR-Vbeta1</i>                | 2.20                    | .0000                   | 3.18e-05                |     |
| Carcinoembryonic antigen gene family (CGM3)                                 | 24256    | <i>PSG18</i>                    | 1.61                    | .0001                   | 0.00831627              |     |
| quinoid dihydropteridine reductase                                          | 64192    | <i>QDPR</i>                     | -1.70                   | .0343                   | 0.218922533             |     |
| rabaptin 5                                                                  | 54190    | <i>RABEP1</i>                   | -1.46                   | .0204                   | 0.162411357             |     |
| RASD family, member 2                                                       | 171099   | <i>RASD2</i>                    | 1.13                    | .2983                   | 0.645268138             |     |
| Ras association (RalGDS/AF-6) domain family 5                               | 54355    | <i>RASSF5</i>                   | 1.15                    | .1864                   | 0.528802493             |     |
| ribosomal protein L10A                                                      | 81729    | <i>RPL10A(includesEG:81729)</i> | -1.40                   | .0364                   | 0.225382474             |     |
| ribosomal protein L27                                                       | 64306    | <i>RPL27</i>                    | -1.33                   | .0245                   | 0.181311206             |     |
| ribosomal protein L28                                                       | 64638    | <i>RPL28</i>                    | -1.65                   | .0005                   | 0.019279688             |     |
| ribosomal protein L29                                                       | 29283    | <i>RPL29(includesEG:29283)</i>  | -1.66                   | .0011                   | 0.029296571             |     |
| ribosomal protein S12                                                       | 65139    | <i>RPS12</i>                    | 1.55                    | .0012                   | 0.0316706               |     |
| ribosomal protein S15                                                       | 29285    | <i>RPS15</i>                    | -1.37                   | .0212                   | 0.16563314              |     |
| ribosomal protein S21                                                       | 81775    | <i>RPS21</i>                    | -1.04                   | .7860                   | 0.92990797              |     |
| ribosomal protein S27a                                                      | 81777    | <i>RPS27A</i>                   | 1.09                    | .5567                   | 0.826186782             |     |
| ribosomal protein S9                                                        | 81772    | <i>RPS9</i>                     | 1.46                    | .0018                   | 0.039884914             |     |
| spondin 1                                                                   | 64456    | <i>SPON1</i>                    | 1.46                    | .0006                   | 0.021028906             |     |
| sulfotransferase family 4A, member 1                                        | 58953    | <i>SULT4A1</i>                  | -1.45                   | .0008                   | 0.025012801             |     |
| synaptogyrin 2                                                              | 89815    | <i>SYNGR2</i>                   | -1.47                   | .0016                   | 0.038035447             |     |
| tachykinin receptor 2                                                       | 25007    | <i>TACR2</i>                    | 1.27                    | .0327                   | 0.212543742             |     |
| testis-enhanced gene transcript                                             | 24822    | <i>TEGT</i>                     | -1.63                   | .0004                   | 0.015893027             |     |
| translocase of inner mitochondrial membrane 22 homolog (yeast)              | 79463    | <i>TIMM22</i>                   | -1.48                   | .0054                   | 0.07023214              |     |
| transmembrane protein with EGF-like and two follistatin-like domains 1      | 63845    | <i>TMEFF1</i>                   | -1.85                   | .0059                   | 0.075505805             |     |
| translocase of outer mitochondrial membrane 20 homolog (yeast)              | 266601   | <i>TOMM20</i>                   | 1.18                    | .1323                   | 0.451237424             |     |
| vesicle-associated membrane protein 2                                       | 24803    | <i>VAMP2</i>                    | 2.23                    | .0000                   | 0.002259596             |     |
| zinc finger protein 111                                                     | 170849   | <i>ZNF227</i>                   | -1.69                   | .0006                   | 0.019354079             |     |

We propose that these genes was unlikely to be related to dysplasia induction. Genes were categorized according to their cellular functions (in bold and italics).

**Table W4.** T + E<sub>2</sub>-Insensitive Panel: Genes that Showed No Significant Changes in Their Expression Levels in the LPs or/and VPs following T + E<sub>2</sub> Treatment Relative to Their Respective Untreated Controls.

| Gene Names                                                                                   | Locus ID | Symbol         |
|----------------------------------------------------------------------------------------------|----------|----------------|
| <b>Cellular movement</b>                                                                     |          |                |
| arrestin, beta 2                                                                             | 25388    | <i>ARRB2</i>   |
| androgen receptor                                                                            | 24208    | <i>AR</i>      |
| signal transducer and activator of transcription 5A                                          | 24918    | <i>STAT5A</i>  |
| interleukin 7                                                                                | 25647    | <i>IL7</i>     |
| chemokine (C-C motif) ligand 3                                                               | 25542    | <i>CCL3</i>    |
| neuropilin 2                                                                                 | 81527    | <i>NRP2</i>    |
| midkine                                                                                      | 81517    | <i>MDK</i>     |
| <i>v-myc</i> myelocytomatosis viral-related oncogene, neuroblastoma-derived (avian) (mapped) | 298894   | <i>MYCN</i>    |
| peptide YY (mapped)                                                                          | 287730   | <i>PYY</i>     |
| cyclin-dependent kinase 5                                                                    | 140908   | <i>CDK5</i>    |
| protein tyrosine phosphatase, nonreceptor type 12                                            | 117255   | <i>PTPN12</i>  |
| calcium and integrin binding 1 (calmyrin)                                                    | 81823    | <i>CIB1</i>    |
| neogenin                                                                                     | 81735    | <i>NEO1</i>    |
| mitogen-activated protein kinase 14                                                          | 81649    | <i>MAPK14</i>  |
| activated leukocyte cell adhesion molecule                                                   | 79559    | <i>ALCAM</i>   |
| matrix metalloproteinase 16                                                                  | 65205    | <i>MMP16</i>   |
| complexin 1                                                                                  | 64832    | <i>CPLX1</i>   |
| rhoB gene                                                                                    | 64373    | <i>RHOB</i>    |
| legumain                                                                                     | 63865    | <i>LGMIN</i>   |
| matrix metalloproteinase 8                                                                   | 63849    | <i>MMP8</i>    |
| cd86 antigen                                                                                 | 56822    | <i>CD86</i>    |
| lectin, galactose binding, soluble 1                                                         | 56646    | <i>LGALS1</i>  |
| neuroblastoma, suppression of tumorigenicity 1                                               | 50594    | <i>NBL1</i>    |
| phosphatase and tensin homolog                                                               | 50557    | <i>PTEN</i>    |
| endothelial differentiation sphingolipid                                                     | 29733    | <i>EDG1</i>    |
| G-protein-coupled receptor 1                                                                 |          |                |
| collagen, type 1, alpha 1                                                                    | 29393    | <i>COL1A1</i>  |
| calpain, small subunit 1                                                                     | 29156    | <i>CAPNS1</i>  |
| neurofibromatosis 2                                                                          | 25744    | <i>NF2</i>     |
| synaptotagmin 3                                                                              | 25731    | <i>SYT3</i>    |
| integrin beta 4                                                                              | 25724    | <i>ITGB4</i>   |
| Inhibitor of DNA binding 2, dominant negative                                                | 25587    | <i>ID2</i>     |
| helix-loop-helix protein                                                                     |          |                |
| peptidylprolyl isomerase A                                                                   | 25518    | <i>PPIA</i>    |
| paired box gene 6                                                                            | 25509    | <i>PAX6</i>    |
| intercellular adhesion molecule 1                                                            | 25464    | <i>ICAM1</i>   |
| glial cell line-derived neurotrophic factor family                                           | 25454    | <i>GFRA1</i>   |
| receptor alpha 1                                                                             |          |                |
| arrestin, beta 1                                                                             | 25387    | <i>ARRB1</i>   |
| cytochrome P450, family 19, subfamily a, polypeptide 1                                       | 25147    | <i>CYP19A1</i> |
| CD24 antigen                                                                                 | 25145    | <i>CD24</i>    |
| tropomyosin 4                                                                                | 24852    | <i>TPM4</i>    |
| ATP-binding cassette, subfamily C (CFTR/MRP), member 1                                       | 24565    | <i>ABCC1</i>   |
| insulin-like growth factor 1                                                                 | 24482    | <i>IGF1</i>    |
| <b>Cell death</b>                                                                            |          |                |
| arrestin, beta 2                                                                             | 25388    | <i>ARRB2</i>   |
| androgen receptor                                                                            | 24208    | <i>AR</i>      |
| signal transducer and activator of transcription 5A                                          | 24918    | <i>STAT5A</i>  |
| interleukin 7                                                                                | 25647    | <i>IL7</i>     |
| chemokine (C-C motif) ligand 3                                                               | 25542    | <i>CCL3</i>    |
| midkine                                                                                      | 81517    | <i>MDK</i>     |
| <i>v-myc</i> myelocytomatosis viral-related oncogene, neuroblastoma-derived (avian) (mapped) | 298894   | <i>MYCN</i>    |
| peptide YY (mapped)                                                                          | 287730   | <i>PYY</i>     |
| cyclin-dependent kinase 5                                                                    | 140908   | <i>CDK5</i>    |
| calcium and integrin binding 1 (calmyrin)                                                    | 81823    | <i>CIB1</i>    |
| mitogen-activated protein kinase 14                                                          | 81649    | <i>MAPK14</i>  |
| rhoB gene                                                                                    | 64373    | <i>RHOB</i>    |
| matrix metalloproteinase 8                                                                   | 63849    | <i>MMP8</i>    |
| cd86 antigen                                                                                 | 56822    | <i>CD86</i>    |
| lectin, galactose binding, soluble 1                                                         | 56646    | <i>LGALS1</i>  |
| phosphatase and tensin homolog                                                               | 50557    | <i>PTEN</i>    |
| endothelial differentiation sphingolipid                                                     | 29733    | <i>EDG1</i>    |
| G-protein-coupled receptor 1                                                                 |          |                |
| calpain, small subunit 1                                                                     | 29156    | <i>CAPNS1</i>  |
| neurofibromatosis 2                                                                          | 25744    | <i>NF2</i>     |
| integrin beta 4                                                                              | 25724    | <i>ITGB4</i>   |
| Inhibitor of DNA binding 2, dominant negative                                                | 25587    | <i>ID2</i>     |
| helix-loop-helix protein                                                                     |          |                |

**Table W4.** (continued)

| Gene Names                                                                                   | Locus ID | Symbol         |
|----------------------------------------------------------------------------------------------|----------|----------------|
| peptidylprolyl isomerase A                                                                   | 25518    | <i>PPIA</i>    |
| paired box gene 6                                                                            | 25509    | <i>PAX6</i>    |
| intercellular adhesion molecule 1                                                            | 25464    | <i>ICAM1</i>   |
| glial cell line-derived neurotrophic factor family                                           | 25454    | <i>GFRA1</i>   |
| receptor alpha 1                                                                             |          |                |
| cytochrome P450, family 19, subfamily a, polypeptide 1                                       | 25147    | <i>CYP19A1</i> |
| CD24 antigen                                                                                 | 25145    | <i>CD24</i>    |
| ATP-binding cassette, subfamily C (CFTR/MRP), member 1                                       | 24565    | <i>ABCC1</i>   |
| insulin-like growth factor 1                                                                 | 24482    | <i>IGF1</i>    |
| metallothionein 1a                                                                           | 24567    | <i>MT1E</i>    |
| metallothionein 3                                                                            | 117038   | <i>MT3</i>     |
| structure-specific recognition protein 1                                                     | 81785    | <i>SSRP1</i>   |
| casein kinase II, alpha 1 polypeptide                                                        | 116549   | <i>CSNK2A1</i> |
| calcitonin receptor                                                                          | 116506   | <i>CALCR</i>   |
| epithelial membrane protein 3                                                                | 81505    | <i>EMP3</i>    |
| persephin                                                                                    | 25525    | <i>PSPN</i>    |
| HLA-B-associated transcript 3                                                                | 94342    | <i>BAT3</i>    |
| cyclin-dependent kinase 2                                                                    | 362817   | <i>CDK2</i>    |
| cell division cycle 25 homolog A ( <i>S. cerevisiae</i> )                                    | 171102   | <i>CDC25A</i>  |
| protein tyrosine phosphatase, nonreceptor type 23                                            | 117552   | <i>PTPN23</i>  |
| peroxiredoxin 1                                                                              | 117254   | <i>PRDX1</i>   |
| thyroid hormone receptor interactor 10                                                       | 116717   | <i>TRIP10</i>  |
| A kinase (PRKA) anchor protein 1                                                             | 114124   | <i>AKAP1</i>   |
| calbindin 1                                                                                  | 83839    | <i>CALB1</i>   |
| wild-type p53-induced gene 1                                                                 | 64394    | <i>ZMAT3</i>   |
| unc-5 homolog A ( <i>C. elegans</i> )                                                        | 60629    | <i>UNC5A</i>   |
| transglutaminase 1                                                                           | 60335    | <i>TGM1</i>    |
| mitogen-activated protein kinase 13                                                          | 29513    | <i>MAPK13</i>  |
| glutathione S-transferase, pi 2                                                              | 29438    | <i>GSTP1</i>   |
| fatty acid amide hydrolase                                                                   | 29347    | <i>FAAH</i>    |
| prothymosin alpha                                                                            | 29222    | <i>PTMA</i>    |
| stannin                                                                                      | 29140    | <i>SNN</i>     |
| monoamine oxidase B                                                                          | 25750    | <i>MAOB</i>    |
| prostaglandin D <sub>2</sub> synthase                                                        | 25526    | <i>PTGDS</i>   |
| glypican 3                                                                                   | 25236    | <i>GPC3</i>    |
| cytochrome P450, family 2, subfamily c, polypeptide 1                                        | 25086    | <i>CYP2E1</i>  |
| ATPase, Cu <sup>2+</sup> transporting, beta polypeptide                                      | 24218    | <i>ATP7B</i>   |
| <b>Cell cycle</b>                                                                            |          |                |
| androgen receptor                                                                            | 24208    | <i>AR</i>      |
| signal transducer and activator of transcription 5A                                          | 24918    | <i>STAT5A</i>  |
| interleukin 7                                                                                | 25647    | <i>IL7</i>     |
| chemokine (C-C motif) ligand 3                                                               | 25542    | <i>CCL3</i>    |
| midkine                                                                                      | 81517    | <i>MDK</i>     |
| <i>v-myc</i> myelocytomatosis viral-related oncogene, neuroblastoma-derived (avian) (mapped) | 298894   | <i>MYCN</i>    |
| mitogen-activated protein kinase 14                                                          | 81649    | <i>MAPK14</i>  |
| rhoB gene                                                                                    | 64373    | <i>RHOB</i>    |
| lectin, galactose binding, soluble 1                                                         | 56646    | <i>LGALS1</i>  |
| phosphatase and tensin homolog                                                               | 50557    | <i>PTEN</i>    |
| endothelial differentiation sphingolipid                                                     | 29733    | <i>EDG1</i>    |
| G-protein-coupled receptor 1                                                                 |          |                |
| neurofibromatosis 2                                                                          | 25744    | <i>NF2</i>     |
| Inhibitor of DNA binding 2, dominant negative                                                | 25587    | <i>ID2</i>     |
| helix-loop-helix protein                                                                     |          |                |
| paired box gene 6                                                                            | 25509    | <i>PAX6</i>    |
| insulin-like growth factor 1                                                                 | 24482    | <i>IGF1</i>    |
| structure-specific recognition protein 1                                                     | 81785    | <i>SSRP1</i>   |
| casein kinase II, alpha 1 polypeptide                                                        | 116549   | <i>CSNK2A1</i> |
| calcitonin receptor                                                                          | 116506   | <i>CALCR</i>   |
| cyclin-dependent kinase 2                                                                    | 362817   | <i>CDK2</i>    |
| cell division cycle 25 homolog A ( <i>S. cerevisiae</i> )                                    | 171102   | <i>CDC25A</i>  |
| prothymosin alpha                                                                            | 29222    | <i>PTMA</i>    |
| collagen, type 1, alpha 1                                                                    | 29393    | <i>COL1A1</i>  |
| arrestin, beta 1                                                                             | 25387    | <i>ARRB1</i>   |
| high mobility group box transcription factor 1                                               | 27080    | <i>HBP1</i>    |
| septin 9                                                                                     | 83788    | <i>SEPT9</i>   |
| <b>Cell morphology</b>                                                                       |          |                |
| androgen receptor                                                                            | 24208    | <i>AR</i>      |
| interleukin 7                                                                                | 25647    | <i>IL7</i>     |
| chemokine (C-C motif) ligand 3                                                               | 25542    | <i>CCL3</i>    |
| <i>v-myc</i> myelocytomatosis viral-related oncogene, neuroblastoma-derived (avian) (mapped) | 298894   | <i>MYCN</i>    |
| mitogen-activated protein kinase 14                                                          | 81649    | <i>MAPK14</i>  |

Table W4. (continued)

| Gene Names                                                                            | Locus ID | Symbol          |
|---------------------------------------------------------------------------------------|----------|-----------------|
| rhoB gene                                                                             | 64373    | <i>RHOB</i>     |
| lectin, galactose binding, soluble 1                                                  | 56646    | <i>LGALS1</i>   |
| phosphatase and tensin homolog                                                        | 50557    | <i>PTEN</i>     |
| endothelial differentiation sphingolipid                                              | 29733    | <i>EDG1</i>     |
| G-protein-coupled receptor 1                                                          |          |                 |
| Inhibitor of DNA binding 2, dominant negative helix-loop-helix protein                | 25587    | <i>ID2</i>      |
| paired box gene 6                                                                     | 25509    | <i>PAX6</i>     |
| insulin-like growth factor 1                                                          | 24482    | <i>IGF1</i>     |
| cyclin-dependent kinase 2                                                             | 362817   | <i>CDK2</i>     |
| cell division cycle 25 homolog A ( <i>S. cerevisiae</i> )                             | 171102   | <i>CDC25A</i>   |
| collagen, type 1, alpha 1                                                             | 29393    | <i>COL1A1</i>   |
| high mobility group box transcription factor 1                                        | 27080    | <i>HBP1</i>     |
| arrestin, beta 2                                                                      | 25388    | <i>ARRB2</i>    |
| cyclin-dependent kinase 5                                                             | 140908   | <i>CDK5</i>     |
| calcium and integrin binding 1 (calmyrin)                                             | 81823    | <i>CIB1</i>     |
| integrin beta 4                                                                       | 25724    | <i>ITGB4</i>    |
| intercellular adhesion molecule 1                                                     | 25464    | <i>ICAM1</i>    |
| glial cell line-derived neurotrophic factor family receptor alpha 1                   | 25454    | <i>GFRA1</i>    |
| cytochrome P450, family 19, subfamily a, polypeptide 1                                | 25147    | <i>CYP19A1</i>  |
| CD24 antigen                                                                          | 25145    | <i>CD24</i>     |
| protein tyrosine phosphatase, nonreceptor type 23                                     | 117552   | <i>PTPN23</i>   |
| peroxiredoxin 1                                                                       | 117254   | <i>PRDX1</i>    |
| calbindin 1                                                                           | 83839    | <i>CALB1</i>    |
| mitogen-activated protein kinase 13                                                   | 29513    | <i>MAPK13</i>   |
| prostaglandin D <sub>2</sub> synthase                                                 | 25526    | <i>PTGDS</i>    |
| protein tyrosine phosphatase, nonreceptor type 12                                     | 117255   | <i>PTPN12</i>   |
| inositol polyphosphate phosphatase-like 1                                             | 65038    | <i>INPPL1</i>   |
| RAS protein-specific guanine nucleotide-releasing factor 1                            | 192213   | <i>RASGRF1</i>  |
| procollagen, type I, alpha 2                                                          | 84352    | <i>COL1A2</i>   |
| ERM-binding phosphoprotein                                                            | 59114    | <i>SLC9A3R1</i> |
| clathrin, heavy polypeptide (Hc)                                                      | 54241    | <i>CLTC</i>     |
| <b>Cellular growth and proliferation</b>                                              |          |                 |
| androgen receptor                                                                     | 24208    | <i>AR</i>       |
| interleukin 7                                                                         | 25647    | <i>IL7</i>      |
| chemokine (C-C motif) ligand 3                                                        | 25542    | <i>CCL3</i>     |
| v-myc myelocytomatosis viral-related oncogene, neuroblastoma-derived (avian) (mapped) | 298894   | <i>MYCN</i>     |
| mitogen-activated protein kinase 14                                                   | 81649    | <i>MAPK14</i>   |
| rhoB gene                                                                             | 64373    | <i>RHOB</i>     |
| lectin, galactose binding, soluble 1                                                  | 56646    | <i>LGALS1</i>   |
| phosphatase and tensin homolog                                                        | 50557    | <i>PTEN</i>     |
| endothelial differentiation sphingolipid                                              | 29733    | <i>EDG1</i>     |
| G-protein-coupled receptor 1                                                          |          |                 |
| Inhibitor of DNA binding 2, dominant negative helix-loop-helix protein                | 25587    | <i>ID2</i>      |
| paired box gene 6                                                                     | 25509    | <i>PAX6</i>     |
| insulin-like growth factor 1                                                          | 24482    | <i>IGF1</i>     |
| cyclin-dependent kinase 2                                                             | 362817   | <i>CDK2</i>     |
| cell division cycle 25 homolog A ( <i>S. cerevisiae</i> )                             | 171102   | <i>CDC25A</i>   |
| collagen, type 1, alpha 1                                                             | 29393    | <i>COL1A1</i>   |
| arrestin, beta 2                                                                      | 25388    | <i>ARRB2</i>    |
| cyclin-dependent kinase 5                                                             | 140908   | <i>CDK5</i>     |
| integrin beta 4                                                                       | 25724    | <i>ITGB4</i>    |
| intercellular adhesion molecule 1                                                     | 25464    | <i>ICAM1</i>    |
| glial cell line-derived neurotrophic factor family receptor alpha 1                   | 25454    | <i>GFRA1</i>    |
| cytochrome P450, family 19, subfamily a, polypeptide 1                                | 25147    | <i>CYP19A1</i>  |
| CD24 antigen                                                                          | 25145    | <i>CD24</i>     |
| peroxiredoxin 1                                                                       | 117254   | <i>PRDX1</i>    |
| inositol polyphosphate phosphatase-like 1                                             | 65038    | <i>INPPL1</i>   |
| RAS protein-specific guanine nucleotide-releasing factor 1                            | 192213   | <i>RASGRF1</i>  |
| ERM-binding phosphoprotein                                                            | 59114    | <i>SLC9A3R1</i> |
| clathrin, heavy polypeptide (Hc)                                                      | 54241    | <i>CLTC</i>     |
| signal transducer and activator of transcription 5A                                   | 24918    | <i>STAT5A</i>   |
| midkine                                                                               | 81517    | <i>MDK</i>      |
| neurofibromatosis 2                                                                   | 25744    | <i>NF2</i>      |
| casein kinase II, alpha 1 polypeptide                                                 | 116549   | <i>CSNK2A1</i>  |
| calcitonin receptor                                                                   | 116506   | <i>CALCR</i>    |
| prothymosin alpha                                                                     | 29222    | <i>PTMA</i>     |
| peptide YY (mapped)                                                                   | 287730   | <i>PYY</i>      |

Table W4. (continued)

| Gene Names                                                                                | Locus ID | Symbol          |
|-------------------------------------------------------------------------------------------|----------|-----------------|
| cd86 antigen                                                                              | 56822    | <i>CD86</i>     |
| calpain, small subunit 1                                                                  | 29156    | <i>CAPNS1</i>   |
| peptidylprolyl isomerase A                                                                | 25518    | <i>PPIA</i>     |
| metallothionein 1a                                                                        | 24567    | <i>MT1E</i>     |
| metallothionein 3                                                                         | 117038   | <i>MT3</i>      |
| epithelial membrane protein 3                                                             | 81505    | <i>EMP3</i>     |
| wild-type p53-induced gene 1                                                              | 64394    | <i>ZMAT3</i>    |
| glutathione S-transferase, pi 2                                                           | 29438    | <i>GSTP1</i>    |
| glypican 3                                                                                | 25236    | <i>GPC3</i>     |
| neogenin                                                                                  | 81735    | <i>NEO1</i>     |
| legumain                                                                                  | 63865    | <i>LGMN</i>     |
| beta-microseminoprotein                                                                   | 29311    | <i>MSMB</i>     |
| solute carrier family 7 (cationic amino acid transporter, y+ system), member 7            | 83509    | <i>SLC7A7</i>   |
| nuclear factor I/X                                                                        | 81524    | <i>NFIX</i>     |
| insulin-induced gene 1                                                                    | 64194    | <i>INSIG1</i>   |
| FXYP domain-containing ion transport regulator 1                                          | 58971    | <i>FXYP1</i>    |
| fibroblast growth factor 17                                                               | 29368    | <i>FGF17</i>    |
| solute carrier family 4, member 1                                                         | 24779    | <i>SLC4A1</i>   |
| <b>Molecular transport</b>                                                                |          |                 |
| chemokine (C-C motif) ligand 3                                                            | 25542    | <i>CCL3</i>     |
| phosphatase and tensin homolog                                                            | 50557    | <i>PTEN</i>     |
| endothelial differentiation sphingolipid                                                  | 29733    | <i>EDG1</i>     |
| G-protein-coupled receptor 1                                                              |          |                 |
| insulin-like growth factor 1                                                              | 24482    | <i>IGF1</i>     |
| arrestin, beta 2                                                                          | 25388    | <i>ARRB2</i>    |
| intercellular adhesion molecule 1                                                         | 25464    | <i>ICAM1</i>    |
| peroxiredoxin 1                                                                           | 117254   | <i>PRDX1</i>    |
| inositol polyphosphate phosphatase-like 1                                                 | 65038    | <i>INPPL1</i>   |
| ERM-binding phosphoprotein                                                                | 59114    | <i>SLC9A3R1</i> |
| signal transducer and activator of transcription 5A                                       | 24918    | <i>STAT5A</i>   |
| calcitonin receptor                                                                       | 116506   | <i>CALCR</i>    |
| peptidylprolyl isomerase A                                                                | 25518    | <i>PPIA</i>     |
| insulin-induced gene 1                                                                    | 64194    | <i>INSIG1</i>   |
| solute carrier family 4, member 1                                                         | 24779    | <i>SLC4A1</i>   |
| calbindin 1                                                                               | 83839    | <i>CALB1</i>    |
| arrestin, beta 1                                                                          | 25387    | <i>ARRB1</i>    |
| ATP-binding cassette, subfamily C (CFTR/MRP), member 1                                    | 24565    | <i>ABCC1</i>    |
| A kinase (PRKA) anchor protein 1                                                          | 114124   | <i>AKAP1</i>    |
| cytochrome P450, family 2, subfamily e, polypeptide 1                                     | 25086    | <i>CYP2E1</i>   |
| ATPase, Cu <sup>2+</sup> transporting, beta polypeptide                                   | 24218    | <i>ATP7B</i>    |
| carbonic anhydrase 2                                                                      | 54231    | <i>CA2</i>      |
| solute carrier family 32 (GABA vesicular transporter), member 1                           | 83612    | <i>SLC32A1</i>  |
| potassium inwardly rectifying channel, subfamily J, member 11                             | 83535    | <i>KCNJ11</i>   |
| solute carrier family 30 (zinc transporter), member 2                                     | 25362    | <i>SLC30A2</i>  |
| sodium channel, nonvoltage-gated, type I, alpha polypeptide                               | 25122    | <i>SCNN1A</i>   |
| potassium voltage-gated channel, Shab-related subfamily, member 2                         | 117105   | <i>KCNB2</i>    |
| nuclear receptor subfamily 1, group I, member 2                                           | 84385    | <i>NR1I2</i>    |
| transient receptor potential cation channel, subfamily C, member 2                        | 64573    | <i>TRPC2</i>    |
| hyperpolarization-activated, cyclic nucleotide-gated K <sup>+</sup> 4                     | 59266    | <i>HCN4</i>     |
| solute carrier family 14 (urea transporter), member 1                                     | 54301    | <i>SLC14A1</i>  |
| potassium intermediate/small conductance calcium-activated channel, subfamily N, member 3 | 54263    | <i>KCNK3</i>    |
| solute carrier family 6 (neurotransmitter transporter, betaine/GABA), member 12           | 50676    | <i>SLC6A12</i>  |
| potassium inwardly rectifying channel, subfamily J, member 3                              | 50599    | <i>KCNJ3</i>    |
| <b>DNA replication, recombination, and repair</b>                                         |          |                 |
| phosphatase and tensin homolog                                                            | 50557    | <i>PTEN</i>     |
| insulin-like growth factor 1                                                              | 24482    | <i>IGF1</i>     |
| arrestin, beta 2                                                                          | 25388    | <i>ARRB2</i>    |
| inositol polyphosphate phosphatase-like 1                                                 | 65038    | <i>INPPL1</i>   |
| arrestin, beta 1                                                                          | 25387    | <i>ARRB1</i>    |
| cyclin-dependent kinase 2                                                                 | 362817   | <i>CDK2</i>     |
| cell division cycle 25 homolog A ( <i>S. cerevisiae</i> )                                 | 171102   | <i>CDC25A</i>   |

Table W4. (continued)

| Gene Names                                                               | Locus ID | Symbol          |
|--------------------------------------------------------------------------|----------|-----------------|
| <b>Cellular assembly and organization</b>                                |          |                 |
| phosphatase and tensin homolog                                           | 50557    | <i>PTEN</i>     |
| insulin-like growth factor 1                                             | 24482    | <i>IGF1</i>     |
| cyclin-dependent kinase 2                                                | 362817   | <i>CDK2</i>     |
| endothelial differentiation sphingolipid<br>G-protein-coupled receptor 1 | 29733    | <i>EDG1</i>     |
| intercellular adhesion molecule 1                                        | 25464    | <i>ICAM1</i>    |
| A kinase (PRKA) anchor protein 1                                         | 114124   | <i>AKAP1</i>    |
| mitogen-activated protein kinase 14                                      | 81649    | <i>MAPK14</i>   |
| rhoB gene                                                                | 64373    | <i>RHOB</i>     |
| cyclin-dependent kinase 5                                                | 140908   | <i>CDK5</i>     |
| glial cell line-derived neurotrophic factor family<br>receptor alpha 1   | 25454    | <i>GFRA1</i>    |
| CD24 antigen                                                             | 25145    | <i>CD24</i>     |
| peptide YY (mapped)                                                      | 287730   | <i>PYY</i>      |
| thyroid hormone receptor interactor 10<br>complexin 1                    | 116717   | <i>TRIP10</i>   |
| synaptotagmin 3                                                          | 64832    | <i>CPLX1</i>    |
| LIM motif-containing protein kinase 2                                    | 25731    | <i>SYT3</i>     |
| coronin, actin-binding protein, 1B                                       | 29524    | <i>LIMK2</i>    |
| synapsin III                                                             | 29474    | <i>CORO1B</i>   |
|                                                                          | 29130    | <i>SYN3</i>     |
| <b>Cell signaling</b>                                                    |          |                 |
| insulin-like growth factor 1                                             | 24482    | <i>IGF1</i>     |
| endothelial differentiation sphingolipid<br>G-protein-coupled receptor 1 | 29733    | <i>EDG1</i>     |
| intercellular adhesion molecule 1                                        | 25464    | <i>ICAM1</i>    |
| A kinase (PRKA) anchor protein 1                                         | 114124   | <i>AKAP1</i>    |
| cyclin-dependent kinase 5                                                | 140908   | <i>CDK5</i>     |
| arrestin, beta 2                                                         | 25388    | <i>ARRB2</i>    |
| arrestin, beta 1                                                         | 25387    | <i>ARRB1</i>    |
| chemokine (C-C motif) ligand 3                                           | 25542    | <i>CCL3</i>     |
| ERM-binding phosphoprotein                                               | 59114    | <i>SLC9A3R1</i> |
| calcitonin receptor                                                      | 116506   | <i>CALCR</i>    |
| peptidylprolyl isomerase A                                               | 25518    | <i>PPIA</i>     |
| calbindin 1                                                              | 83839    | <i>CALB1</i>    |
| potassium inwardly rectifying channel, subfamily J,<br>member 11         | 83535    | <i>KCNJ11</i>   |
| transient receptor potential cation channel,<br>subfamily C, member 2    | 64573    | <i>TRPC2</i>    |
| homeodomain interacting protein kinase 3                                 | 83617    | <i>HIPK3</i>    |
| <b>Nucleic acid metabolism</b>                                           |          |                 |
| insulin-like growth factor 1                                             | 24482    | <i>IGF1</i>     |
| endothelial differentiation sphingolipid<br>G-protein-coupled receptor 1 | 29733    | <i>EDG1</i>     |
| intercellular adhesion molecule 1                                        | 25464    | <i>ICAM1</i>    |
| arrestin, beta 2                                                         | 25388    | <i>ARRB2</i>    |
| arrestin, beta 1                                                         | 25387    | <i>ARRB1</i>    |
| chemokine (C-C motif) ligand 3                                           | 25542    | <i>CCL3</i>     |
| calcitonin receptor                                                      | 116506   | <i>CALCR</i>    |
| <b>Small molecule biochemistry</b>                                       |          |                 |
| insulin-like growth factor 1                                             | 24482    | <i>IGF1</i>     |
| endothelial differentiation sphingolipid<br>G-protein-coupled receptor 1 | 29733    | <i>EDG1</i>     |
| intercellular adhesion molecule 1                                        | 25464    | <i>ICAM1</i>    |
| arrestin, beta 2                                                         | 25388    | <i>ARRB2</i>    |
| arrestin, beta 1                                                         | 25387    | <i>ARRB1</i>    |
| chemokine (C-C motif) ligand 3                                           | 25542    | <i>CCL3</i>     |
| calcitonin receptor                                                      | 116506   | <i>CALCR</i>    |
| cyclin-dependent kinase 5                                                | 140908   | <i>CDK5</i>     |
| homeodomain interacting protein kinase 3                                 | 83617    | <i>HIPK3</i>    |
| phosphatase and tensin homolog                                           | 50557    | <i>PTEN</i>     |
| cyclin-dependent kinase 2                                                | 362817   | <i>CDK2</i>     |
| mitogen-activated protein kinase 14                                      | 81649    | <i>MAPK14</i>   |
| LIM motif-containing protein kinase 2                                    | 29524    | <i>LIMK2</i>    |
| inositol polyphosphate phosphatase-like 1                                | 65038    | <i>INPPL1</i>   |
| peroxiredoxin 1                                                          | 117254   | <i>PRDX1</i>    |
| signal transducer and activator of transcription 5A                      | 24918    | <i>STAT5A</i>   |
| insulin-induced gene 1                                                   | 64194    | <i>INSIG1</i>   |
| solute carrier family 4, member 1                                        | 24779    | <i>SLC4A1</i>   |
| ATP-binding cassette, subfamily C (CFTR/MRP),<br>member 1                | 24565    | <i>ABCC1</i>    |
| ATPase, Cu <sup>2+</sup> transporting, beta polypeptide                  | 24218    | <i>ATP7B</i>    |
| carbonic anhydrase 2                                                     | 54231    | <i>CA2</i>      |

Table W4. (continued)

| Gene Names                                                                                 | Locus ID | Symbol         |
|--------------------------------------------------------------------------------------------|----------|----------------|
| solute carrier family 32 (GABA vesicular<br>transporter), member 1                         | 83612    | <i>SLC32A1</i> |
| nuclear receptor subfamily 1, group I, member 2                                            | 84385    | <i>NRII2</i>   |
| solute carrier family 6 (neurotransmitter<br>transporter, betaine/GABA), member 12         | 50676    | <i>SLC6A12</i> |
| casein kinase II, alpha 1 polypeptide                                                      | 116549   | <i>CSNK2A1</i> |
| metallothionein 1a                                                                         | 24567    | <i>MT1E</i>    |
| metallothionein 3                                                                          | 117038   | <i>MT3</i>     |
| neogenin                                                                                   | 81735    | <i>NEO1</i>    |
| protein tyrosine phosphatase, nonreceptor type 12                                          | 117255   | <i>PTPN12</i>  |
| transglutaminase 1                                                                         | 60335    | <i>TGM1</i>    |
| fatty acid amide hydrolase                                                                 | 29347    | <i>FAAH</i>    |
| monoamine oxidase B                                                                        | 25750    | <i>MAOB</i>    |
| phosphorylase kinase, gamma 2 (testis)                                                     | 140671   | <i>PHKG2</i>   |
| solute carrier family 17 (sodium-dependent<br>inorganic phosphate cotransporter), member 7 | 116638   | <i>SLC17A7</i> |
| Rab geranylgeranyl transferase, a subunit                                                  | 58983    | <i>RABGGTA</i> |
| <b>Cellular development</b>                                                                |          |                |
| insulin-like growth factor 1                                                               | 24482    | <i>IGF1</i>    |
| intercellular adhesion molecule 1                                                          | 25464    | <i>ICAM1</i>   |
| arrestin, beta 2                                                                           | 25388    | <i>ARRB2</i>   |
| chemokine (C-C motif) ligand 3                                                             | 25542    | <i>CCL3</i>    |
| calcitonin receptor                                                                        | 116506   | <i>CALCR</i>   |
| cyclin-dependent kinase 5                                                                  | 140908   | <i>CDK5</i>    |
| phosphatase and tensin homolog                                                             | 50557    | <i>PTEN</i>    |
| cyclin-dependent kinase 2                                                                  | 362817   | <i>CDK2</i>    |
| mitogen-activated protein kinase 14                                                        | 81649    | <i>MAPK14</i>  |
| LIM motif-containing protein kinase 2                                                      | 29524    | <i>LIMK2</i>   |
| signal transducer and activator of transcription 5A                                        | 24918    | <i>STAT5A</i>  |
| carbonic anhydrase 2                                                                       | 54231    | <i>CA2</i>     |
| protein tyrosine phosphatase, nonreceptor type 12                                          | 117255   | <i>PTPN12</i>  |
| transglutaminase 1                                                                         | 60335    | <i>TGM1</i>    |
| peptidylprolyl isomerase A                                                                 | 25518    | <i>PPIA</i>    |
| rhoB gene                                                                                  | 64373    | <i>RHOB</i>    |
| glial cell line-derived neurotrophic factor family<br>receptor alpha 1                     | 25454    | <i>GFRA1</i>   |
| CD24 antigen                                                                               | 25145    | <i>CD24</i>    |
| androgen receptor                                                                          | 24208    | <i>AR</i>      |
| interleukin 7                                                                              | 25647    | <i>IL7</i>     |
| lectin, galactose binding, soluble 1                                                       | 56646    | <i>LGALS1</i>  |
| Inhibitor of DNA binding 2, dominant negative<br>helix-loop-helix protein                  | 25587    | <i>ID2</i>     |
| paired box gene 6                                                                          | 25509    | <i>PAX6</i>    |
| integrin beta 4                                                                            | 25724    | <i>ITGB4</i>   |
| cytochrome P450, family 19, subfamily a,<br>polypeptide 1                                  | 25147    | <i>CYP19A1</i> |
| prothymosin alpha                                                                          | 29222    | <i>PTMA</i>    |
| cd86 antigen                                                                               | 56822    | <i>CD86</i>    |
| high mobility group box transcription factor 1                                             | 27080    | <i>HBP1</i>    |
| calcium and integrin binding 1 (calmyrin)                                                  | 81823    | <i>CIB1</i>    |
| neuropilin 2                                                                               | 81527    | <i>NRP2</i>    |
| Notch gene homolog 3 ( <i>Drosophila</i> )                                                 | 56761    | <i>NOTCH3</i>  |
| <b>Post-Translational Modification</b>                                                     |          |                |
| insulin-like growth factor 1                                                               | 24482    | <i>IGF1</i>    |
| arrestin, beta 2                                                                           | 25388    | <i>ARRB2</i>   |
| chemokine (C-C motif) ligand 3                                                             | 25542    | <i>CCL3</i>    |
| cyclin-dependent kinase 5                                                                  | 140908   | <i>CDK5</i>    |
| phosphatase and tensin homolog                                                             | 50557    | <i>PTEN</i>    |
| cyclin-dependent kinase 2                                                                  | 362817   | <i>CDK2</i>    |
| mitogen-activated protein kinase 14                                                        | 81649    | <i>MAPK14</i>  |
| LIM motif-containing protein kinase 2                                                      | 29524    | <i>LIMK2</i>   |
| protein tyrosine phosphatase, nonreceptor type 12                                          | 117255   | <i>PTPN12</i>  |
| transglutaminase 1                                                                         | 60335    | <i>TGM1</i>    |
| peptidylprolyl isomerase A                                                                 | 25518    | <i>PPIA</i>    |
| interleukin 7                                                                              | 25647    | <i>IL7</i>     |
| lectin, galactose binding, soluble 1                                                       | 56646    | <i>LGALS1</i>  |
| homeodomain interacting protein kinase 3                                                   | 83617    | <i>HIPK3</i>   |
| peroxiredoxin 1                                                                            | 117254   | <i>PRDX1</i>   |
| nuclear receptor subfamily 1, group I, member 2                                            | 84385    | <i>NRII2</i>   |
| casein kinase II, alpha 1 polypeptide                                                      | 116549   | <i>CSNK2A1</i> |
| phosphorylase kinase, gamma 2 (testis)                                                     | 140671   | <i>PHKG2</i>   |
| Rab geranylgeranyl transferase, a subunit                                                  | 58983    | <i>RABGGTA</i> |
| gamma-glutamyl carboxylase                                                                 | 81716    | <i>GGCX</i>    |

Table W4. (continued)

| Gene Names                                                                                    | Locus ID | Symbol         |
|-----------------------------------------------------------------------------------------------|----------|----------------|
| <b>Cellular function and maintenance</b>                                                      |          |                |
| insulin-like growth factor 1                                                                  | 24482    | <i>IGF1</i>    |
| chemokine (C–C motif) ligand 3                                                                | 25542    | <i>CCL3</i>    |
| cyclin-dependent kinase 5                                                                     | 140908   | <i>CDK5</i>    |
| phosphatase and tensin homolog                                                                | 50557    | <i>PTEN</i>    |
| mitogen-activated protein kinase 14                                                           | 81649    | <i>MAPK14</i>  |
| interleukin 7                                                                                 | 25647    | <i>IL7</i>     |
| peroxiredoxin 1                                                                               | 117254   | <i>PRDX1</i>   |
| casein kinase II, alpha 1 polypeptide                                                         | 116549   | <i>CSNK2A1</i> |
| intercellular adhesion molecule 1                                                             | 25464    | <i>ICAM1</i>   |
| CD24 antigen                                                                                  | 25145    | <i>CD24</i>    |
| prothymosin alpha                                                                             | 29222    | <i>PTMA</i>    |
| high mobility group box transcription factor 1                                                | 27080    | <i>HBP1</i>    |
| ATP-binding cassette, subfamily C (CFTR/MRP), member 1                                        | 24565    | <i>ABCC1</i>   |
| peptide YY (mapped)                                                                           | 287730   | <i>PYY</i>     |
| complexin 1                                                                                   | 64832    | <i>CPLX1</i>   |
| synaptotagmin 3                                                                               | 25731    | <i>SYT3</i>    |
| v- <i>myc</i> myelocytomatosis viral-related oncogene, neuroblastoma-derived (avian) (mapped) | 298894   | <i>MYCN</i>    |
| Rsc5 protein                                                                                  | 171455   | <i>EXOC2</i>   |
| <b>Cell to cell signaling and interaction</b>                                                 |          |                |
| insulin-like growth factor 1                                                                  | 24482    | <i>IGF1</i>    |
| chemokine (C–C motif) ligand 3                                                                | 25542    | <i>CCL3</i>    |
| cyclin-dependent kinase 5                                                                     | 140908   | <i>CDK5</i>    |
| phosphatase and tensin homolog                                                                | 50557    | <i>PTEN</i>    |
| mitogen-activated protein kinase 14                                                           | 81649    | <i>MAPK14</i>  |
| interleukin 7                                                                                 | 25647    | <i>IL7</i>     |
| intercellular adhesion molecule 1                                                             | 25464    | <i>ICAM1</i>   |
| CD24 antigen                                                                                  | 25145    | <i>CD24</i>    |
| prothymosin alpha                                                                             | 29222    | <i>PTMA</i>    |
| peptide YY (mapped)                                                                           | 287730   | <i>PYY</i>     |
| complexin 1                                                                                   | 64832    | <i>CPLX1</i>   |
| v- <i>myc</i> myelocytomatosis viral-related oncogene, neuroblastoma-derived (avian) (mapped) | 298894   | <i>MYCN</i>    |
| arrestin, beta 2                                                                              | 25388    | <i>ARRB2</i>   |
| lectin, galactose binding, soluble 1                                                          | 56646    | <i>LGALS1</i>  |
| signal transducer and activator of transcription 5A                                           | 24918    | <i>STAT5A</i>  |
| glial cell line-derived neurotrophic factor family receptor alpha 1                           | 25454    | <i>GFRA1</i>   |
| androgen receptor                                                                             | 24208    | <i>AR</i>      |
| Inhibitor of DNA binding 2, dominant negative helix–loop–helix protein                        | 25587    | <i>ID2</i>     |
| integrin beta 4                                                                               | 25724    | <i>ITGB4</i>   |
| cd86 antigen                                                                                  | 56822    | <i>CD86</i>    |
| calcium and integrin binding 1 (calytrin)                                                     | 81823    | <i>CIB1</i>    |
| endothelial differentiation sphingolipid G-protein–coupled receptor 1                         | 29733    | <i>EDG1</i>    |
| inositol polyphosphate phosphatase-like 1                                                     | 65038    | <i>INPPL1</i>  |
| solute carrier family 4, member 1                                                             | 24779    | <i>SLC4A1</i>  |
| neogenin                                                                                      | 81735    | <i>NEO1</i>    |
| solute carrier family 17 (sodium-dependent inorganic phosphate cotransporter), member 7       | 116638   | <i>SLC17A7</i> |
| calbindin 1                                                                                   | 83839    | <i>CALB1</i>   |
| hyperpolarization-activated, cyclic nucleotide-gated K <sup>+</sup> 4                         | 59266    | <i>HCN4</i>    |
| potassium intermediate/small conductance calcium-activated channel, subfamily N, member 3     | 54263    | <i>KCNN3</i>   |
| RAS protein-specific guanine nucleotide-releasing factor 1                                    | 192213   | <i>RASGRF1</i> |
| midkine                                                                                       | 81517    | <i>MDK</i>     |
| glypican 3                                                                                    | 25236    | <i>GPC3</i>    |
| activated leukocyte cell adhesion molecule                                                    | 79559    | <i>ALCAM</i>   |
| tropomodulin 2                                                                                | 58814    | <i>TMOD2</i>   |
| cholinergic receptor, nicotinic, beta polypeptide 2 (neuronal)                                | 54239    | <i>CHRN2</i>   |
| <b>Gene expression</b>                                                                        |          |                |
| insulin-like growth factor 1                                                                  | 24482    | <i>IGF1</i>    |
| phosphatase and tensin homolog                                                                | 50557    | <i>PTEN</i>    |
| mitogen-activated protein kinase 14                                                           | 81649    | <i>MAPK14</i>  |
| prothymosin alpha                                                                             | 29222    | <i>PTMA</i>    |
| v- <i>myc</i> myelocytomatosis viral-related oncogene, neuroblastoma-derived (avian) (mapped) | 298894   | <i>MYCN</i>    |
| lectin, galactose binding, soluble 1                                                          | 56646    | <i>LGALS1</i>  |

Table W4. (continued)

| Gene Names                                                                              | Locus ID | Symbol         |
|-----------------------------------------------------------------------------------------|----------|----------------|
| signal transducer and activator of transcription 5A                                     | 24918    | <i>STAT5A</i>  |
| androgen receptor                                                                       | 24208    | <i>AR</i>      |
| Inhibitor of DNA binding 2, dominant negative helix–loop–helix protein                  | 25587    | <i>ID2</i>     |
| integrin beta 4                                                                         | 25724    | <i>ITGB4</i>   |
| cd86 antigen                                                                            | 56822    | <i>CD86</i>    |
| endothelial differentiation sphingolipid G-protein–coupled receptor 1                   | 29733    | <i>EDG1</i>    |
| inositol polyphosphate phosphatase-like 1                                               | 65038    | <i>INPPL1</i>  |
| neogenin                                                                                | 81735    | <i>NEO1</i>    |
| RAS protein-specific guanine nucleotide-releasing factor 1                              | 192213   | <i>RASGRF1</i> |
| cyclin-dependent kinase 2                                                               | 362817   | <i>CDK2</i>    |
| nuclear receptor subfamily 1, group I, member 2                                         | 84385    | <i>NRII2</i>   |
| rhoB gene                                                                               | 64373    | <i>RHOB</i>    |
| paired box gene 6                                                                       | 25509    | <i>PAX6</i>    |
| cytochrome P450, family 19, subfamily a, polypeptide 1                                  | 25147    | <i>CYP19A1</i> |
| Notch gene homolog 3 ( <i>Drosophila</i> )                                              | 56761    | <i>NOTCH3</i>  |
| glutathione S-transferase, pi 2                                                         | 29438    | <i>GSTP1</i>   |
| nuclear factor I/X                                                                      | 81524    | <i>NFIX</i>    |
| FXYD domain-containing ion transport regulator 1                                        | 58971    | <i>FXYD1</i>   |
| mitogen-activated protein kinase 13                                                     | 29513    | <i>MAPK13</i>  |
| structure-specific recognition protein 1                                                | 81785    | <i>SSRP1</i>   |
| proteasome (prosome, macropain) 26S subunit, non-ATPase, 9                              | 161475   | <i>PSMD9</i>   |
| basic transcription element binding protein 1                                           | 117560   | <i>KLF9</i>    |
| Kruppel-like factor 15                                                                  | 85497    | <i>KLF15</i>   |
| general transcription factor IIa 2                                                      | 83828    | <i>GTF2A2</i>  |
| Sjogren syndrome antigen B                                                              | 81783    | <i>SSB</i>     |
| fatty acid binding protein 4, adipocyte                                                 | 79451    | <i>FABP4</i>   |
| PDZ and LIM domain 1 (elfin)                                                            | 54133    | <i>PDLIM1</i>  |
| <b>Amino acid metabolism</b>                                                            |          |                |
| insulin-like growth factor 1                                                            | 24482    | <i>IGF1</i>    |
| phosphatase and tensin homolog                                                          | 50557    | <i>PTEN</i>    |
| mitogen-activated protein kinase 14                                                     | 81649    | <i>MAPK14</i>  |
| cyclin-dependent kinase 2                                                               | 362817   | <i>CDK2</i>    |
| nuclear receptor subfamily 1, group I, member 2                                         | 84385    | <i>NRII2</i>   |
| cyclin-dependent kinase 5                                                               | 140908   | <i>CDK5</i>    |
| solute carrier family 4, member 1                                                       | 24779    | <i>SLC4A1</i>  |
| solute carrier family 17 (sodium-dependent inorganic phosphate cotransporter), member 7 | 116638   | <i>SLC17A7</i> |
| casein kinase II, alpha 1 polypeptide                                                   | 116549   | <i>CSNK2A1</i> |
| LIM motif-containing protein kinase 2                                                   | 29524    | <i>LIMK2</i>   |
| protein tyrosine phosphatase, nonreceptor type 12                                       | 117255   | <i>PTPN12</i>  |
| transglutaminase 1                                                                      | 60335    | <i>TGM1</i>    |
| homeodomain interacting protein kinase 3                                                | 83617    | <i>HIPK3</i>   |
| phosphorylase kinase, gamma 2 (testis)                                                  | 140671   | <i>PHKG2</i>   |
| Rab geranylgeranyl transferase, a subunit                                               | 58983    | <i>RABGGTA</i> |
| solute carrier family 32 (GABA vesicular transporter), member 1                         | 83612    | <i>SLC32A1</i> |
| <b>Lipid metabolism</b>                                                                 |          |                |
| insulin-like growth factor 1                                                            | 24482    | <i>IGF1</i>    |
| phosphatase and tensin homolog                                                          | 50557    | <i>PTEN</i>    |
| nuclear receptor subfamily 1, group I, member 2                                         | 84385    | <i>NRII2</i>   |
| transglutaminase 1                                                                      | 60335    | <i>TGM1</i>    |
| signal transducer and activator of transcription 5A                                     | 24918    | <i>STAT5A</i>  |
| inositol polyphosphate phosphatase-like 1                                               | 65038    | <i>INPPL1</i>  |
| neogenin                                                                                | 81735    | <i>NEO1</i>    |
| arrestin, beta 2                                                                        | 25388    | <i>ARRB2</i>   |
| ATP-binding cassette, subfamily C (CFTR/MRP), member 1                                  | 24565    | <i>ABCC1</i>   |
| arrestin, beta 1                                                                        | 25387    | <i>ARRB1</i>   |
| insulin-induced gene 1                                                                  | 64194    | <i>INSIG1</i>  |
| fatty acid amide hydrolase                                                              | 29347    | <i>FAAH</i>    |
| <b>Cellular compromise</b>                                                              |          |                |
| ATP-binding cassette, subfamily C (CFTR/MRP), member 1                                  | 24565    | <i>ABCC1</i>   |
| fatty acid amide hydrolase                                                              | 29347    | <i>FAAH</i>    |
| mitogen-activated protein kinase 14                                                     | 81649    | <i>MAPK14</i>  |
| RAS protein-specific guanine nucleotide-releasing factor 1                              | 192213   | <i>RASGRF1</i> |
| peroxiredoxin 1                                                                         | 117254   | <i>PRDX1</i>   |
| metallothionein 1a                                                                      | 24567    | <i>MT1E</i>    |
| metallothionein 3                                                                       | 117038   | <i>MT3</i>     |

**Table W4.** (continued)

| Gene Names                                                                    | Locus ID | Symbol            |
|-------------------------------------------------------------------------------|----------|-------------------|
| cytochrome <i>P450</i> , family 2, subfamily e, polypeptide 1                 | 25086    | <i>CYP2E1</i>     |
| <b>Vitamin and mineral metabolism</b>                                         |          |                   |
| insulin-like growth factor 1                                                  | 24482    | <i>IGF1</i>       |
| endothelial differentiation sphingolipid<br>G-protein-coupled receptor 1      | 29733    | <i>EDG1</i>       |
| chemokine (C–C motif) ligand 3                                                | 25542    | <i>CCL3</i>       |
| intercellular adhesion molecule 1                                             | 25464    | <i>ICAM1</i>      |
| calbindin 1                                                                   | 83839    | <i>CALB1</i>      |
| peptidylprolyl isomerase A                                                    | 25518    | <i>PPIA</i>       |
| calcitonin receptor                                                           | 116506   | <i>CALCR</i>      |
| A kinase (PRKA) anchor protein 1                                              | 114124   | <i>AKAP1</i>      |
| ERM-binding phosphoprotein                                                    | 59114    | <i>SLC9A3R1</i>   |
| potassium inwardly rectifying channel, subfamily J,<br>member 11              | 83535    | <i>KCNJ11</i>     |
| transient receptor potential cation channel,<br>subfamily C, member 2         | 64573    | <i>TRPC2</i>      |
| <b>Drug metabolism</b>                                                        |          |                   |
| ATPase, Cu <sup>2+</sup> transporting, beta polypeptide                       | 24218    | <i>ATP7B</i>      |
| <b>Others/unclassified</b>                                                    |          |                   |
| solute carrier family 5 (sodium-dependent vitamin<br>transporter), member 6   | 170551   | <i>SLC5A6</i>     |
| solute carrier family 28 (sodium-coupled<br>nucleoside transporter), member 2 | 60423    | <i>SLC28A2</i>    |
| selenoprotein B, plasma, 1                                                    | 29360    | <i>SEPP1</i>      |
| etoile, Sam68-like protein SLM-2                                              | 64015    | <i>KHDRBS3</i>    |
| ubc2e ubiquitin-conjugating enzyme                                            | 641452   | <i>UBE2D2</i>     |
| RT1 class II, locus Da                                                        | 294269   | <i>HLA-DRA</i>    |
| similar to Leydig cell tumor 10 kDa protein                                   | 288913   | <i>C19ORF53</i>   |
| voltage-gated channel like 1                                                  | 266760   | <i>VGCNL1</i>     |
| guanine nucleotide binding protein (G protein),<br>gamma 8 subunit            | 245986   | <i>GNG8</i>       |
| membrane and microfilament-associated protein p58                             | 207121   | <i>RGD:727794</i> |
| seminal vesicle secretion 3                                                   | 192239   | <i>SEMG2</i>      |
| methionine adenosyltransferase II, alpha                                      | 171347   | <i>MAT2A</i>      |
| LIM homeobox protein 5                                                        | 124451   | <i>LHX5</i>       |
| CD52 antigen                                                                  | 117054   | <i>CD52</i>       |
| CEA-related cell adhesion molecule 9                                          | 116711   | <i>CEACAM9</i>    |
| ubiquilin 1                                                                   | 114590   | <i>UBQLN1</i>     |
| carboxylesterase 3                                                            | 113902   | <i>CES1</i>       |
| synaptogyrin 2                                                                | 89815    | <i>SYNGR2</i>     |
| low-density lipoprotein receptor-related protein 3                            | 89787    | <i>LRP3</i>       |
| MAD homolog 9 ( <i>Drosophila</i> )                                           | 85435    | <i>SMAD9</i>      |
| protein kinase C, delta binding protein                                       | 85332    | <i>PRKCDBP</i>    |
| nucleobindin 1                                                                | 84595    | <i>NUCB1</i>      |
| RAB6A, member RAS oncogene family                                             | 84379    | <i>RAB6A</i>      |
| ATPase, class II, type 9A                                                     | 84011    | <i>ATP9A</i>      |
| NSFL1 (p97) cofactor (p47)                                                    | 83809    | <i>NSFL1C</i>     |
| tripartite motif protein 3                                                    | 83616    | <i>TRIM3</i>      |
| discoidin domain receptor family, member 2                                    | 83573    | <i>DDR2</i>       |
| cadherin EGF LAG seven-pass G-type receptor 2                                 | 83465    | <i>CELSR2</i>     |
| 5-hydroxytryptamine (serotonin) receptor 5B                                   | 79247    | <i>HTR5B</i>      |
| ADP-ribosylation factor 4                                                     | 79120    | <i>ARF4</i>       |
| olfactory receptor 226                                                        | 65140    | <i>OR6A2</i>      |
| probasin                                                                      | 54193    | <i>PBSN</i>       |
| mini chromosome maintenance deficient 6 ( <i>S. cerevisiae</i> )              | 29685    | <i>MCM6</i>       |
| argininosuccinate synthetase                                                  | 25698    | <i>ASS1</i>       |
| sialyltransferase 8 C                                                         | 25547    | <i>ST8SLA3</i>    |
| apolipoprotein B editing complex 1                                            | 25383    | <i>APOBEC1</i>    |
| lysozyme                                                                      | 25211    | <i>LYZ</i>        |
| secretoglobulin, family 2A, member 1                                          | 25010    | <i>PSBP1</i>      |
| phosphoglucomutase 1                                                          | 24645    | <i>PGM1</i>       |
| filaggrin                                                                     | 24641    | <i>FLG</i>        |
| malate dehydrogenase 1, NAD (soluble)                                         | 24551    | <i>MDH1</i>       |

Genes were categorized according to their cellular functions (in bold and italics).

**Table W5.** T + DES–Insensitive Panel: Genes Whose Expression Levels Were Not Significantly Changed in the LPs or/and VP's following T + DES Treatment Relative to Their Respective Untreated Controls.

| Gene Names                                                      | Locus ID | Symbol         |
|-----------------------------------------------------------------|----------|----------------|
| <b>Amino acid metabolism</b>                                    |          |                |
| solute carrier family 32 (GABA vesicular transporter), member 1 | 83612    | <i>SLC32A1</i> |
| <b>Carbohydrate metabolism</b>                                  |          |                |
| protein kinase, AMP-activated, alpha 2 catalytic subunit        | 78975    | <i>PRKAA2</i>  |
| inositol polyphosphate phosphatase–like 1                       | 65038    | <i>INPPL1</i>  |
| neurotrophic tyrosine kinase, receptor, type 3                  | 29613    | <i>NTRK3</i>   |
| mannoside acetyl glucosaminyltransferase 3                      | 29582    | <i>MGAT3</i>   |
| interleukin 7                                                   | 25647    | <i>IL7</i>     |
| <b>Cell cycle</b>                                               |          |                |
| interleukin 7                                                   | 25647    | <i>IL7</i>     |
| myogenic differentiation 1                                      | 337868   | <i>MYOD1</i>   |
| casein kinase II, alpha 1 polypeptide                           | 116549   | <i>CSNK2A1</i> |
| calcitonin receptor                                             | 116506   | <i>CALCR</i>   |
| structure-specific recognition protein 1                        | 81785    | <i>SSRP1</i>   |
| midkine                                                         | 81517    | <i>MDK</i>     |
| chemokine (C–C motif) ligand 3                                  | 25542    | <i>CCL3</i>    |
| signal transducer and activator of transcription 5A             | 24918    | <i>STAT5A</i>  |
| Fanconi anemia, complementation group C                         | 24361    | <i>FANCC</i>   |
| androgen receptor                                               | 24208    | <i>AR</i>      |
| <b>Cell death</b>                                               |          |                |
| interleukin 7                                                   | 25647    | <i>IL7</i>     |
| myogenic differentiation 1                                      | 337868   | <i>MYOD1</i>   |
| casein kinase II, alpha 1 polypeptide                           | 116549   | <i>CSNK2A1</i> |
| calcitonin receptor                                             | 116506   | <i>CALCR</i>   |
| structure-specific recognition protein 1                        | 81785    | <i>SSRP1</i>   |
| midkine                                                         | 81517    | <i>MDK</i>     |
| chemokine (C–C motif) ligand 3                                  | 25542    | <i>CCL3</i>    |
| signal transducer and activator of transcription 5A             | 24918    | <i>STAT5A</i>  |
| Fanconi anemia, complementation group C                         | 24361    | <i>FANCC</i>   |
| androgen receptor                                               | 24208    | <i>AR</i>      |
| protein kinase, AMP-activated, alpha 2 catalytic subunit        | 78975    | <i>PRKAA2</i>  |
| neurotrophic tyrosine kinase, receptor, type 3                  | 29613    | <i>NTRK3</i>   |
| mannoside acetyl glucosaminyltransferase 3                      | 29582    | <i>MGAT3</i>   |
| metallothionein 3                                               | 117038   | <i>MT3</i>     |
| HLA-B–associated transcript 3                                   | 94342    | <i>BAT3</i>    |
| nuclear receptor subfamily 2, group F, member 1                 | 81808    | <i>NR2F1</i>   |
| linker for activation of T cells                                | 81511    | <i>LAT</i>     |
| epithelial membrane protein 3                                   | 81505    | <i>EMP3</i>    |
| thioredoxin reductase 2                                         | 50551    | <i>PAX3</i>    |
| xanthine dehydrogenase                                          | 29289    | <i>XDH</i>     |
| arrestin, beta 2                                                | 25388    | <i>ARRB2</i>   |
| milk fat globule–EGF factor 8 protein                           | 25277    | <i>MFGE8</i>   |
| early growth response 4                                         | 25129    | <i>EGR4</i>    |
| transferrin                                                     | 24856    | <i>TTR</i>     |
| myosin heavy chain 11                                           | 24582    | <i>MYH11</i>   |
| metallothionein 1a                                              | 24567    | <i>MT1E</i>    |
| benzodiazepine receptor, peripheral                             | 24230    | <i>TSPO</i>    |
| <b>Cell morphology</b>                                          |          |                |
| myogenic differentiation 1                                      | 337868   | <i>MYOD1</i>   |
| casein kinase II, alpha 1 polypeptide                           | 116549   | <i>CSNK2A1</i> |
| chemokine (C–C motif) ligand 3                                  | 25542    | <i>CCL3</i>    |
| mannoside acetyl glucosaminyltransferase 3                      | 29582    | <i>MGAT3</i>   |
| nuclear receptor subfamily 2, group F, member 1                 | 81808    | <i>NR2F1</i>   |
| thioredoxin reductase 2                                         | 50551    | <i>PAX3</i>    |
| myosin heavy chain 11                                           | 24582    | <i>MYH11</i>   |
| potassium inwardly rectifying channel, subfamily J, member 11   | 83535    | <i>KCNJ11</i>  |
| lumican                                                         | 81682    | <i>LUM</i>     |
| neuropilin 2                                                    | 81527    | <i>NRP2</i>    |
| high mobility group box transcription factor 1                  | 27080    | <i>HBP1</i>    |
| persephin                                                       | 25525    | <i>PSPN</i>    |
| <b>Cell signaling</b>                                           |          |                |
| linker for activation of T cells                                | 81511    | <i>LAT</i>     |
| arrestin, beta 2                                                | 25388    | <i>ARRB2</i>   |
| <b>Cell to cell signaling and interaction</b>                   |          |                |
| linker for activation of T cells                                | 81511    | <i>LAT</i>     |
| arrestin, beta 2                                                | 25388    | <i>ARRB2</i>   |
| chemokine (C–C motif) ligand 3                                  | 25542    | <i>CCL3</i>    |
| thioredoxin reductase 2                                         | 50551    | <i>PAX3</i>    |

**Table W5.** (continued)

| Gene Names                                                 | Locus ID | Symbol          |
|------------------------------------------------------------|----------|-----------------|
| neuropilin 2                                               | 81527    | <i>NRP2</i>     |
| interleukin 7                                              | 25647    | <i>IL7</i>      |
| midkine                                                    | 81517    | <i>MDK</i>      |
| signal transducer and activator of transcription 5A        | 24918    | <i>STAT5A</i>   |
| Fanconi anemia, complementation group C                    | 24361    | <i>FANCC</i>    |
| xanthine dehydrogenase                                     | 29289    | <i>XDH</i>      |
| milk fat globule–EGF factor 8 protein                      | 25277    | <i>MFGE8</i>    |
| inositol polyphosphate phosphatase–like 1                  | 65038    | <i>INPPL1</i>   |
| pleckstrin homology, Sec7 and coiled/coiled domains 1      | 116691   | <i>PSCD1</i>    |
| a disintegrin and metalloproteinase domain 15 (metargidin) | 57025    | <i>ADAM15</i>   |
| <b>Cellular assembly and organization</b>                  |          |                 |
| neuropilin 2                                               | 81527    | <i>NRP2</i>     |
| signal transducer and activator of transcription 5A        | 24918    | <i>STAT5A</i>   |
| xanthine dehydrogenase                                     | 29289    | <i>XDH</i>      |
| milk fat globule–EGF factor 8 protein                      | 25277    | <i>MFGE8</i>    |
| inositol polyphosphate phosphatase–like 1                  | 65038    | <i>INPPL1</i>   |
| nuclear receptor subfamily 2, group F, member 1            | 81808    | <i>NR2F1</i>    |
| myosin heavy chain 11                                      | 24582    | <i>MYH11</i>    |
| lumican                                                    | 81682    | <i>LUM</i>      |
| androgen receptor                                          | 24208    | <i>AR</i>       |
| neurotrophic tyrosine kinase, receptor, type 3             | 29613    | <i>NTRK3</i>    |
| metallothionein 1a                                         | 24567    | <i>MT1E</i>     |
| <b>Cellular compromise</b>                                 |          |                 |
| xanthine dehydrogenase                                     | 29289    | <i>XDH</i>      |
| neurotrophic tyrosine kinase, receptor, type 3             | 29613    | <i>NTRK3</i>    |
| metallothionein 1a                                         | 24567    | <i>MT1E</i>     |
| linker for activation of T cells                           | 81511    | <i>LAT</i>      |
| chemokine (C–C motif) ligand 3                             | 25542    | <i>CCL3</i>     |
| thioredoxin reductase 2                                    | 50551    | <i>PAX3</i>     |
| metallothionein 3                                          | 117038   | <i>MT3</i>      |
| early growth response 4                                    | 25129    | <i>EGR4</i>     |
| <b>Cellular development</b>                                |          |                 |
| xanthine dehydrogenase                                     | 29289    | <i>XDH</i>      |
| neurotrophic tyrosine kinase, receptor, type 3             | 29613    | <i>NTRK3</i>    |
| linker for activation of T cells                           | 81511    | <i>LAT</i>      |
| chemokine (C–C motif) ligand 3                             | 25542    | <i>CCL3</i>     |
| thioredoxin reductase 2                                    | 50551    | <i>PAX3</i>     |
| neuropilin 2                                               | 81527    | <i>NRP2</i>     |
| signal transducer and activator of transcription 5A        | 24918    | <i>STAT5A</i>   |
| nuclear receptor subfamily 2, group F, member 1            | 81808    | <i>NR2F1</i>    |
| myosin heavy chain 11                                      | 24582    | <i>MYH11</i>    |
| androgen receptor                                          | 24208    | <i>AR</i>       |
| arrestin, beta 2                                           | 25388    | <i>ARRB2</i>    |
| interleukin 7                                              | 25647    | <i>IL7</i>      |
| Fanconi anemia, complementation group C                    | 24361    | <i>FANCC</i>    |
| myogenic differentiation 1                                 | 337868   | <i>MYOD1</i>    |
| high mobility group box transcription factor 1             | 27080    | <i>HBP1</i>     |
| calcitonin receptor                                        | 116506   | <i>CALCR</i>    |
| interferon-induced transmembrane protein 2 (1–8D)          | 114709   | <i>IFITM2</i>   |
| CD164 antigen                                              | 83689    | <i>CD164</i>    |
| etoile, Sam68-like protein SLM-2                           | 64015    | <i>KHDRBS3</i>  |
| carbonic anhydrase 2                                       | 54231    | <i>CA2</i>      |
| testis-specific protein, Y-linked                          | 25223    | <i>TSPY1</i>    |
| histone 1, H1t                                             | 24438    | <i>HIST1H1T</i> |
| <b>Cellular function and maintenance</b>                   |          |                 |
| linker for activation of T cells                           | 81511    | <i>LAT</i>      |
| chemokine (C–C motif) ligand 3                             | 25542    | <i>CCL3</i>     |
| signal transducer and activator of transcription 5A        | 24918    | <i>STAT5A</i>   |
| nuclear receptor subfamily 2, group F, member 1            | 81808    | <i>NR2F1</i>    |
| androgen receptor                                          | 24208    | <i>AR</i>       |
| interleukin 7                                              | 25647    | <i>IL7</i>      |
| Fanconi anemia, complementation group C                    | 24361    | <i>FANCC</i>    |
| myogenic differentiation 1                                 | 337868   | <i>MYOD1</i>    |
| high mobility group box transcription factor 1             | 27080    | <i>HBP1</i>     |
| casein kinase II, alpha 1 polypeptide                      | 116549   | <i>CSNK2A1</i>  |
| <b>Cellular growth and proliferation</b>                   |          |                 |
| chemokine (C–C motif) ligand 3                             | 25542    | <i>CCL3</i>     |
| signal transducer and activator of transcription 5A        | 24918    | <i>STAT5A</i>   |
| androgen receptor                                          | 24208    | <i>AR</i>       |
| interleukin 7                                              | 25647    | <i>IL7</i>      |
| Fanconi anemia, complementation group C                    | 24361    | <i>FANCC</i>    |



Table W5. (continued)

| Gene Names                                                                 | Locus ID | Symbol         |
|----------------------------------------------------------------------------|----------|----------------|
| myogenic differentiation 1                                                 | 337868   | <i>MYOD1</i>   |
| casein kinase II, alpha 1 polypeptide                                      | 116549   | <i>CSNK2A1</i> |
| xanthine dehydrogenase                                                     | 29289    | <i>XDH</i>     |
| neurotrophic tyrosine kinase, receptor, type 3                             | 29613    | <i>NTRK3</i>   |
| thioredoxin reductase 2                                                    | 50551    | <i>PAX3</i>    |
| myosin heavy chain 11                                                      | 24582    | <i>MYH11</i>   |
| arrestin, beta 2                                                           | 25388    | <i>ARRB2</i>   |
| calcitonin receptor                                                        | 116506   | <i>CALCR</i>   |
| CD164 antigen                                                              | 83689    | <i>CD164</i>   |
| testis-specific protein, Y-linked                                          | 25223    | <i>TSPY1</i>   |
| metallothionein 1a                                                         | 24567    | <i>MT1E</i>    |
| metallothionein 3                                                          | 117038   | <i>MT3</i>     |
| early growth response 4                                                    | 25129    | <i>EGR4</i>    |
| lumican                                                                    | 81682    | <i>LUM</i>     |
| midkine                                                                    | 81517    | <i>MDK</i>     |
| a disintegrin and metalloproteinase domain 15 (metargidin)                 | 57025    | <i>ADAM15</i>  |
| mannoside acetyl glucosaminyltransferase 3                                 | 29582    | <i>MGAT3</i>   |
| epithelial membrane protein 3                                              | 81505    | <i>EMP3</i>    |
| nucleosome assembly protein 1-like 1                                       | 89825    | <i>NAP1L1</i>  |
| solute carrier family 29 (nucleoside transporters), member 1               | 63997    | <i>SLC29A1</i> |
| beta-microseminoprotein                                                    | 29311    | <i>MSMB</i>    |
| ferritin light chain 1                                                     | 29292    | <i>FTL</i>     |
| <b>Cellular movement</b>                                                   |          |                |
| chemokine (C-C motif) ligand 3                                             | 25542    | <i>CCL3</i>    |
| androgen receptor                                                          | 24208    | <i>AR</i>      |
| interleukin 7                                                              | 25647    | <i>IL7</i>     |
| xanthine dehydrogenase                                                     | 29289    | <i>XDH</i>     |
| thioredoxin reductase 2                                                    | 50551    | <i>PAX3</i>    |
| myosin heavy chain 11                                                      | 24582    | <i>MYH11</i>   |
| arrestin, beta 2                                                           | 25388    | <i>ARRB2</i>   |
| neuropilin 2                                                               | 81527    | <i>NRP2</i>    |
| <b>DNA replication, recombination, and repair</b>                          |          |                |
| androgen receptor                                                          | 24208    | <i>AR</i>      |
| arrestin, beta 2                                                           | 25388    | <i>ARRB2</i>   |
| structure-specific recognition protein 1                                   | 81785    | <i>SSRP1</i>   |
| phosphodiesterase 5A, cGMP-specific                                        | 171115   | <i>PDE5A</i>   |
| <b>Drug metabolism</b>                                                     |          |                |
| androgen receptor                                                          | 24208    | <i>AR</i>      |
| xanthine dehydrogenase                                                     | 29289    | <i>XDH</i>     |
| solute carrier family 29 (nucleoside transporters), member 1               | 63997    | <i>SLC29A1</i> |
| solute carrier family 28 (sodium-coupled nucleoside transporter), member 2 | 60423    | <i>SLC28A2</i> |
| <b>Free radical scavenging</b>                                             |          |                |
| xanthine dehydrogenase                                                     | 29289    | <i>XDH</i>     |
| Fanconi anemia, complementation group C                                    | 24361    | <i>FANCC</i>   |
| <b>Gene expression</b>                                                     |          |                |
| Fanconi anemia, complementation group C                                    | 24361    | <i>FANCC</i>   |
| androgen receptor                                                          | 24208    | <i>AR</i>      |
| structure-specific recognition protein 1                                   | 81785    | <i>SSRP1</i>   |
| interleukin 7                                                              | 25647    | <i>IL7</i>     |
| myosin heavy chain 11                                                      | 24582    | <i>MYH11</i>   |
| signal transducer and activator of transcription 5A                        | 24918    | <i>STAT5A</i>  |
| myogenic differentiation 1                                                 | 337868   | <i>MYOD1</i>   |
| nuclear receptor subfamily 2, group F, member 1                            | 81808    | <i>NR2F1</i>   |
| <b>Lipid metabolism</b>                                                    |          |                |
| androgen receptor                                                          | 24208    | <i>AR</i>      |
| signal transducer and activator of transcription 5A                        | 24918    | <i>STAT5A</i>  |
| xanthine dehydrogenase                                                     | 29289    | <i>XDH</i>     |
| mannoside acetyl glucosaminyltransferase 3                                 | 29582    | <i>MGAT3</i>   |
| inositol polyphosphate phosphatase-like 1                                  | 65038    | <i>INPPL1</i>  |
| protein kinase, AMP-activated, alpha 2 catalytic subunit                   | 78975    | <i>PRKAA2</i>  |
| nuclear receptor binding factor 1                                          | 29470    | <i>MECR</i>    |
| selenoprotein P, plasma, 1                                                 | 29360    | <i>SEPP1</i>   |
| <b>Molecular transport</b>                                                 |          |                |
| androgen receptor                                                          | 24208    | <i>AR</i>      |
| signal transducer and activator of transcription 5A                        | 24918    | <i>STAT5A</i>  |
| xanthine dehydrogenase                                                     | 29289    | <i>XDH</i>     |
| mannoside acetyl glucosaminyltransferase 3                                 | 29582    | <i>MGAT3</i>   |

Table W5. (continued)

| Gene Names                                                                 | Locus ID | Symbol         |
|----------------------------------------------------------------------------|----------|----------------|
| protein kinase, AMP-activated, alpha 2 catalytic subunit                   | 78975    | <i>PRKAA2</i>  |
| Fanconi anemia, complementation group C                                    | 24361    | <i>FANCC</i>   |
| interleukin 7                                                              | 25647    | <i>IL7</i>     |
| solute carrier family 29 (nucleoside transporters), member 1               | 63997    | <i>SLC29A1</i> |
| solute carrier family 28 (sodium-coupled nucleoside transporter), member 2 | 60423    | <i>SLC28A2</i> |
| neurotrophic tyrosine kinase, receptor, type 3                             | 29613    | <i>NTRK3</i>   |
| carbonic anhydrase 2                                                       | 54231    | <i>CA2</i>     |
| potassium inwardly rectifying channel, subfamily J, member 11              | 83535    | <i>KCNJ11</i>  |
| solute carrier family 5 (sodium-dependent vitamin transporter), member 6   | 170551   | <i>SLC5A6</i>  |
| solute carrier family 32 (GABA vesicular transporter), member 1            | 83612    | <i>SLC32A1</i> |
| solute carrier family 30 (zinc transporter), member 2                      | 25362    | <i>SLC30A2</i> |
| sodium channel, nonvoltage-gated, type I, alpha polypeptide                | 25122    | <i>SCN1A</i>   |
| <b>Nucleic acid metabolism</b>                                             |          |                |
| xanthine dehydrogenase                                                     | 29289    | <i>XDH</i>     |
| solute carrier family 29 (nucleoside transporters), member 1               | 63997    | <i>SLC29A1</i> |
| solute carrier family 28 (sodium-coupled nucleoside transporter), member 2 | 60423    | <i>SLC28A2</i> |
| nuclear receptor binding factor 1                                          | 29470    | <i>MECR</i>    |
| arrestin, beta 2                                                           | 25388    | <i>ARRB2</i>   |
| phosphodiesterase 5A, cGMP-specific                                        | 171115   | <i>PDE5A</i>   |
| <b>Post-translational modification</b>                                     |          |                |
| xanthine dehydrogenase                                                     | 29289    | <i>XDH</i>     |
| <b>RNA post-transcriptional modification</b>                               |          |                |
| Fanconi anemia, complementation group C                                    | 24361    | <i>FANCC</i>   |
| <b>Small molecule biochemistry</b>                                         |          |                |
| xanthine dehydrogenase                                                     | 29289    | <i>XDH</i>     |
| solute carrier family 29 (nucleoside transporters), member 1               | 63997    | <i>SLC29A1</i> |
| solute carrier family 28 (sodium-coupled nucleoside transporter), member 2 | 60423    | <i>SLC28A2</i> |
| nuclear receptor binding factor 1                                          | 29470    | <i>MECR</i>    |
| arrestin, beta 2                                                           | 25388    | <i>ARRB2</i>   |
| phosphodiesterase 5A, cGMP-specific                                        | 171115   | <i>PDE5A</i>   |
| androgen receptor                                                          | 24208    | <i>AR</i>      |
| signal transducer and activator of transcription 5A                        | 24918    | <i>STAT5A</i>  |
| mannoside acetyl glucosaminyltransferase 3                                 | 29582    | <i>MGAT3</i>   |
| protein kinase, AMP-activated, alpha 2 catalytic subunit                   | 78975    | <i>PRKAA2</i>  |
| interleukin 7                                                              | 25647    | <i>IL7</i>     |
| neurotrophic tyrosine kinase, receptor, type 3                             | 29613    | <i>NTRK3</i>   |
| carbonic anhydrase 2                                                       | 54231    | <i>CA2</i>     |
| solute carrier family 5 (sodium-dependent vitamin transporter), member 6   | 170551   | <i>SLC5A6</i>  |
| solute carrier family 32 (GABA vesicular transporter), member 1            | 83612    | <i>SLC32A1</i> |
| inositol polyphosphate phosphatase-like 1                                  | 65038    | <i>INPPL1</i>  |
| selenoprotein P, plasma, 1                                                 | 29360    | <i>SEPP1</i>   |
| metallothionein 1a                                                         | 24567    | <i>MT1E</i>    |
| metallothionein 3                                                          | 117038   | <i>MT3</i>     |
| ferritin light chain 1                                                     | 29292    | <i>FTL</i>     |
| <b>Vitamin and mineral metabolism</b>                                      |          |                |
| solute carrier family 5 (sodium-dependent vitamin transporter), member 6   | 170551   | <i>SLC5A6</i>  |
| linker for activation of T cells                                           | 81511    | <i>LAT</i>     |
| <b>Others/unclassified</b>                                                 |          |                |
| guanine nucleotide binding protein (G protein), gamma 8 subunit            | 245986   | <i>GNG8</i>    |
| H1 histone family, member 4                                                | 201097   | <i>H1F4</i>    |
| glutaminase 2 (liver, mitochondrial)                                       | 192268   | <i>GLS2</i>    |
| seminal vesicle secretion 3                                                | 192239   | <i>SEMG2</i>   |
| proteasome (prosome, macropain) 26S subunit, non-ATPase, 9                 | 161475   | <i>PSMD9</i>   |
| protein tyrosine phosphatase, nonreceptor type 23                          | 117552   | <i>PTPN23</i>  |
| CD52 antigen                                                               | 117054   | <i>CD52</i>    |

**Table W5.** (*continued*)

| Gene Names                                                          | Locus ID | Symbol         |
|---------------------------------------------------------------------|----------|----------------|
| ribosomal protein L6                                                | 117042   | <i>RPL6</i>    |
| importin 13                                                         | 116458   | <i>IPO13</i>   |
| general transcription factor IIa 2                                  | 83828    | <i>GTF2A2</i>  |
| tripartite motif protein 3                                          | 83616    | <i>TRIM3</i>   |
| ribosomal protein L5                                                | 81763    | <i>RPL5</i>    |
| ribosomal protein S8                                                | 65136    | <i>RPS8</i>    |
| defensin beta 3                                                     | 64389    | <i>DEFB4</i>   |
| ribosomal protein L31                                               | 64298    | <i>RPL31</i>   |
| ribosomal protein L35a                                              | 57809    | <i>RPL35A</i>  |
| solute carrier family 14 (urea transporter), member 1               | 54301    | <i>SLC14A1</i> |
| probasin                                                            | 54193    | <i>PBSN</i>    |
| mini chromosome maintenance-deficient 6<br>( <i>S. cerevisiae</i> ) | 29685    | <i>MCM6</i>    |
| proteasome (prosome, macropain) subunit,<br>beta type 3             | 29676    | <i>PSMB3</i>   |
| peptidyl arginine deiminase, type II                                | 29511    | <i>PADI2</i>   |
| coronin, actin-binding protein, 1B                                  | 29474    | <i>CORO1B</i>  |
| ribosomal protein S26                                               | 27139    | <i>RPS26</i>   |
| sialyltransferase 8 C                                               | 25547    | <i>ST8SIA3</i> |
| crystallin, beta B2                                                 | 25422    | <i>CRYBB2</i>  |
| glutamate-ammonia ligase (glutamine synthase)                       | 24957    | <i>CCDC92</i>  |
| malate dehydrogenase 1, NAD (soluble)                               | 24551    | <i>MDH1</i>    |

Genes were categorized according to their cellular functions (in bold and italics).
